# Supplementary material for: Oxysterols from an octocoral of the genus Gorgonia from the eastern Pacific of Panama
Source: Royal Society of Chemistry journal article supplement (doi:10.1039/c6ra04521a), 2016-01-01

## Supplementary Information

### Oxysterols from an octocoral of the genus *Gorgonia* from the eastern Pacific of Panama

Faviola Cardoso-Martínez,<sup>a</sup> José M. de la Rosa,<sup>a</sup> Ana R. Díaz-Marrero,<sup>†a</sup> José Darias,<sup>a</sup> Luis D'Croze,<sup>b,c</sup> M. Dolores Jiménez-Antón,<sup>d,e</sup> M. Jesús Corral,<sup>d,e</sup> Rocío García,<sup>d,e</sup> José M. Alunda<sup>d,e</sup> and Mercedes Cueto<sup>\*a</sup>

<sup>a</sup>*Instituto de Productos Naturales y Agrobiología del CSIC, Avenida Astrofísico F. Sánchez, 3, 38206 La Laguna, Tenerife, Spain*

<sup>b</sup>Departamento de Biología Marina y Limnología, Universidad de Panamá, Panamá

<sup>c</sup>Smithsonian Tropical Research Institute, STRI, BOX 0843-3092, Balboa, Panamá

<sup>d</sup>Departamento de Sanidad Animal (Grupo UCM 910993 ICPVet), Facultad de Veterinaria, Universidad Complutense de Madrid, 28040, Madrid, Spain.

<sup>e</sup>Instituto de Investigación Hospital 12 de Octubre, Avda de Córdoba, s/n, 28041, Madrid, Spain.

<sup>†</sup> Present address: Department of Organic Chemistry, University Institute of Bio-Organic Chemistry "Antonio González" (CIBICAN), University of La Laguna, 38206 Tenerife, Spain.  
E-mail: mcueto@ipna.csic.es

|                                                                |     | INDEX: |
|----------------------------------------------------------------|-----|--------|
| <sup>1</sup> H NMR spectrum of <b>1</b> in CDCl <sub>3</sub>   | S2  |        |
| <sup>13</sup> C NMR spectrum of <b>1</b> in CDCl <sub>3</sub>  | S3  |        |
| <sup>1</sup> H NMR spectrum of <b>2</b> in CDCl <sub>3</sub>   | S4  |        |
| <sup>13</sup> C NMR spectrum of <b>2</b> in CDCl <sub>3</sub>  | S5  |        |
| <sup>1</sup> H NMR spectrum of <b>3</b> in CDCl <sub>3</sub>   | S6  |        |
| <sup>13</sup> C NMR spectrum of <b>3</b> in CDCl <sub>3</sub>  | S7  |        |
| <sup>1</sup> H NMR spectrum of <b>4</b> in CDCl <sub>3</sub>   | S8  |        |
| <sup>13</sup> C NMR spectrum of <b>4</b> in CDCl <sub>3</sub>  | S9  |        |
| <sup>1</sup> H NMR spectrum of <b>5</b> in CDCl <sub>3</sub>   | S10 |        |
| <sup>13</sup> C NMR spectrum of <b>5</b> in CDCl <sub>3</sub>  | S11 |        |
| <sup>1</sup> H NMR spectrum of <b>6</b> in CDCl <sub>3</sub>   | S12 |        |
| <sup>13</sup> C NMR spectrum of <b>6</b> in CDCl <sub>3</sub>  | S13 |        |
| <sup>1</sup> H NMR spectrum of <b>7</b> in CDCl <sub>3</sub>   | S14 |        |
| <sup>13</sup> C NMR spectrum of <b>7</b> in CDCl <sub>3</sub>  | S15 |        |
| <sup>1</sup> H NMR spectrum of <b>8</b> in CDCl <sub>3</sub>   | S16 |        |
| <sup>13</sup> C NMR spectrum of <b>8</b> in CDCl <sub>3</sub>  | S17 |        |
| <sup>1</sup> H NMR spectrum of <b>9</b> in CDCl <sub>3</sub>   | S18 |        |
| <sup>13</sup> C NMR spectrum of <b>9</b> in CDCl <sub>3</sub>  | S19 |        |
| <sup>1</sup> H NMR spectrum of <b>10</b> in CDCl <sub>3</sub>  | S20 |        |
| <sup>13</sup> C NMR spectrum of <b>10</b> in CDCl <sub>3</sub> | S21 |        |
| <sup>1</sup> H NMR spectrum of <b>11</b> in CDCl <sub>3</sub>  | S22 |        |
| <sup>13</sup> C NMR spectrum of <b>11</b> in CDCl <sub>3</sub> | S23 |        |
| <sup>1</sup> H NMR spectrum of <b>12</b> in CDCl <sub>3</sub>  | S24 |        |
| <sup>13</sup> C NMR spectrum of <b>12</b> in CDCl <sub>3</sub> | S25 |        |
| <sup>1</sup> H NMR spectrum of <b>13</b> in CDCl <sub>3</sub>  | S26 |        |
| <sup>13</sup> C NMR spectrum of <b>13</b> in CDCl <sub>3</sub> | S27 |        |
| <sup>1</sup> H NMR spectrum of <b>14</b> in CDCl <sub>3</sub>  | S28 |        |
| <sup>13</sup> C NMR spectrum of <b>14</b> in CDCl <sub>3</sub> | S29 |        |
| <sup>1</sup> H NMR spectrum of <b>15</b> in CDCl <sub>3</sub>  | S30 |        |
| <sup>13</sup> C NMR spectrum of <b>15</b> in CDCl <sub>3</sub> | S31 |        |
| <sup>1</sup> H NMR spectrum of <b>16</b> in CDCl <sub>3</sub>  | S32 |        |
| <sup>13</sup> C NMR spectrum of <b>16</b> in CDCl <sub>3</sub> | S33 |        |
| <sup>1</sup> H NMR spectrum of <b>17</b> in CDCl <sub>3</sub>  | S34 |        |
| <sup>13</sup> C NMR spectrum of <b>17</b> in CDCl <sub>3</sub> | S35 |        |
| <sup>1</sup> H NMR spectrum of <b>18</b> in CDCl <sub>3</sub>  | S36 |        |
| <sup>13</sup> C NMR spectrum of <b>18</b> in CDCl <sub>3</sub> | S37 |        |

<sup>1</sup>H NMR of **1** in CDCl<sub>3</sub>

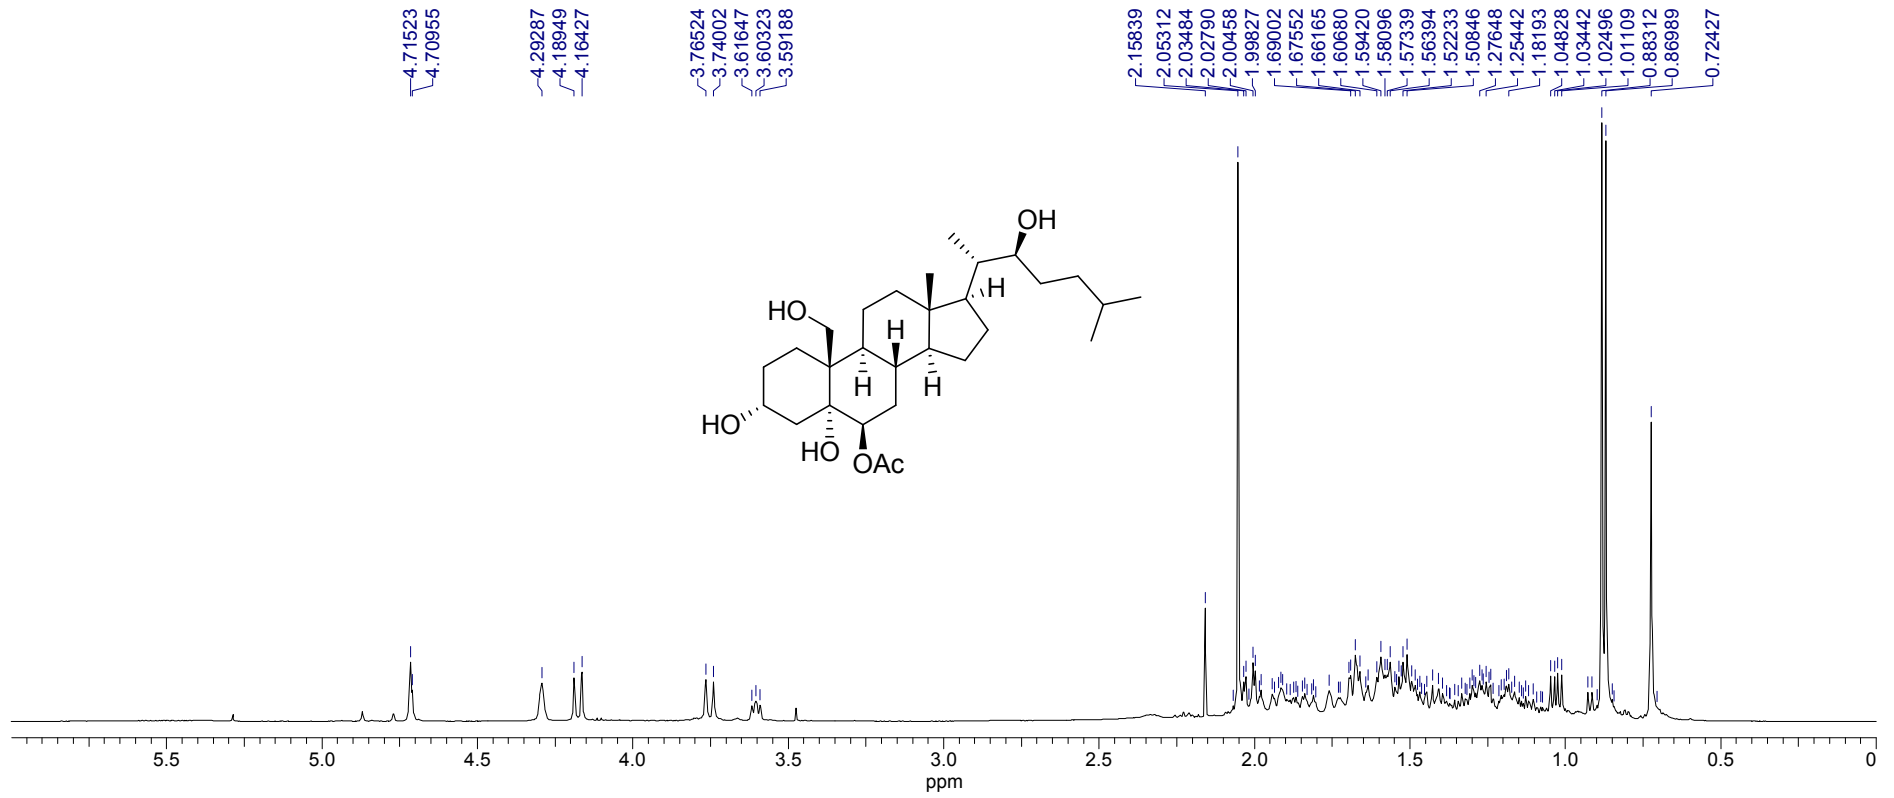

<sup>13</sup>C NMR spectrum of **1** in CDCl<sub>3</sub>

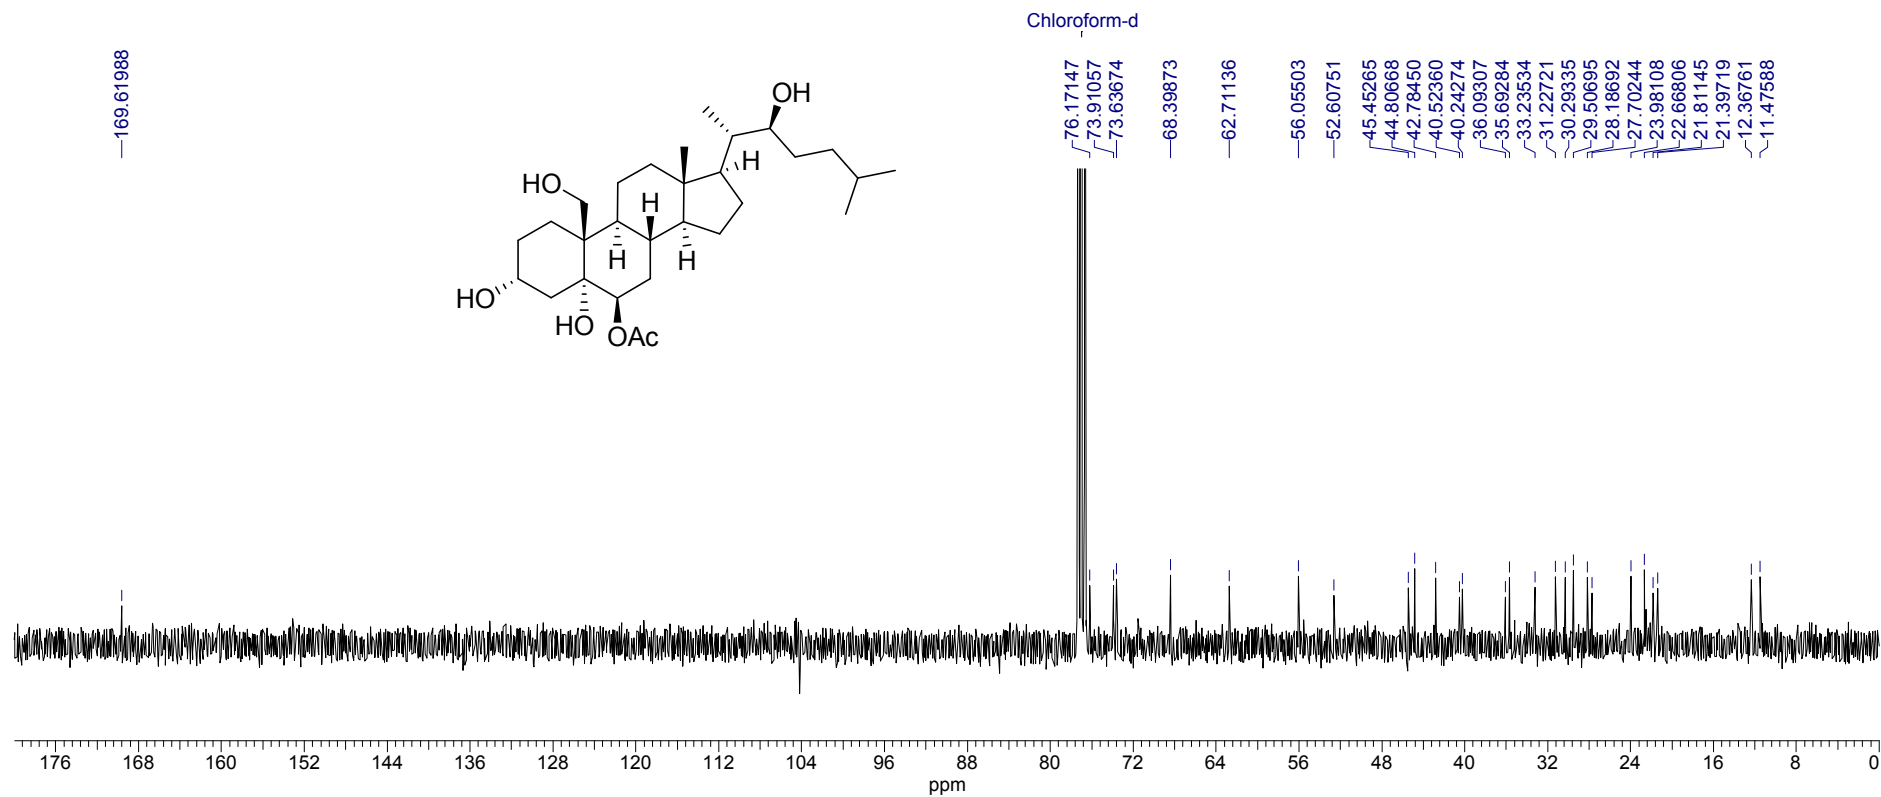

$^1\text{H}$  NMR of **2** in  $\text{CDCl}_3$

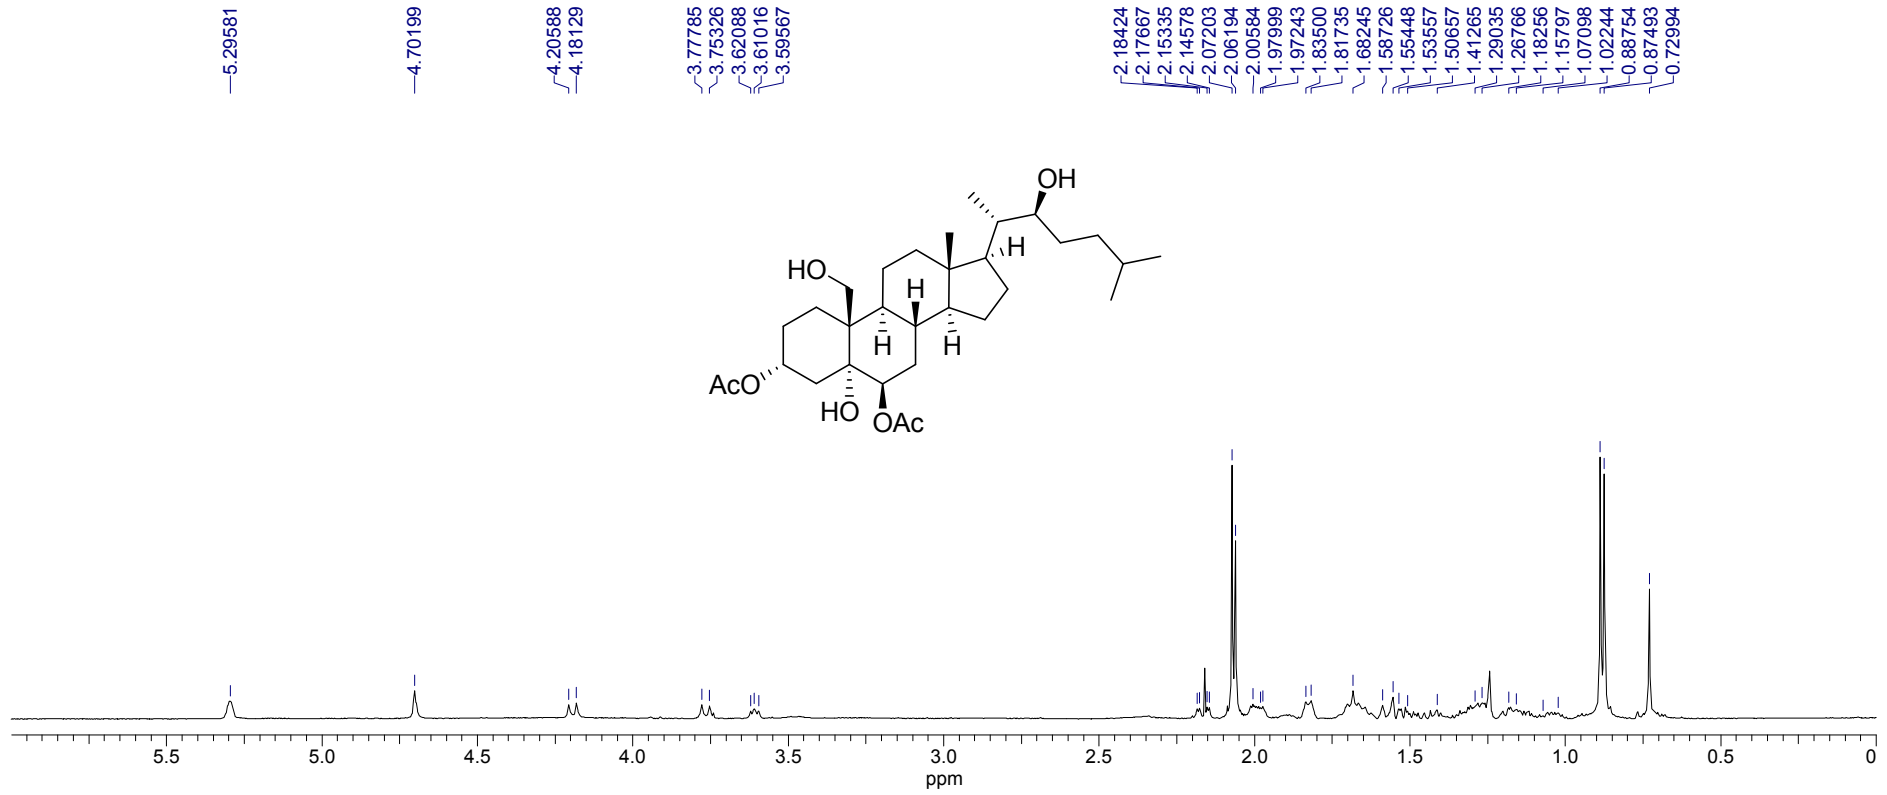

<sup>13</sup>C NMR spectrum of **2** in CDCl<sub>3</sub>

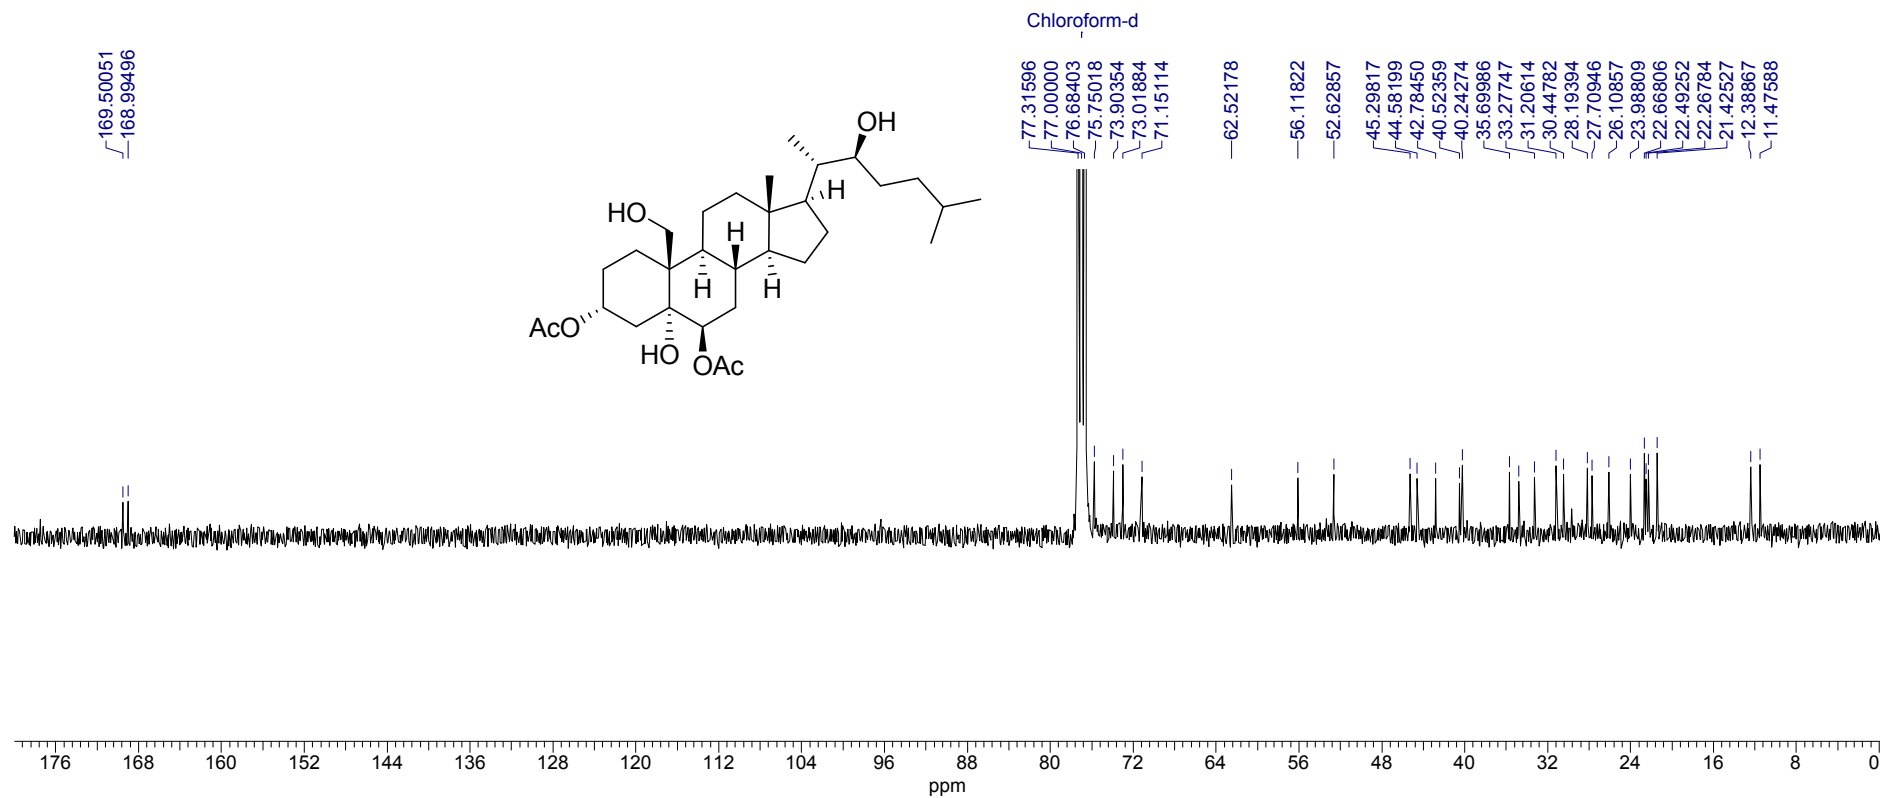

$^1\text{H}$  NMR of **3** in  $\text{CDCl}_3$

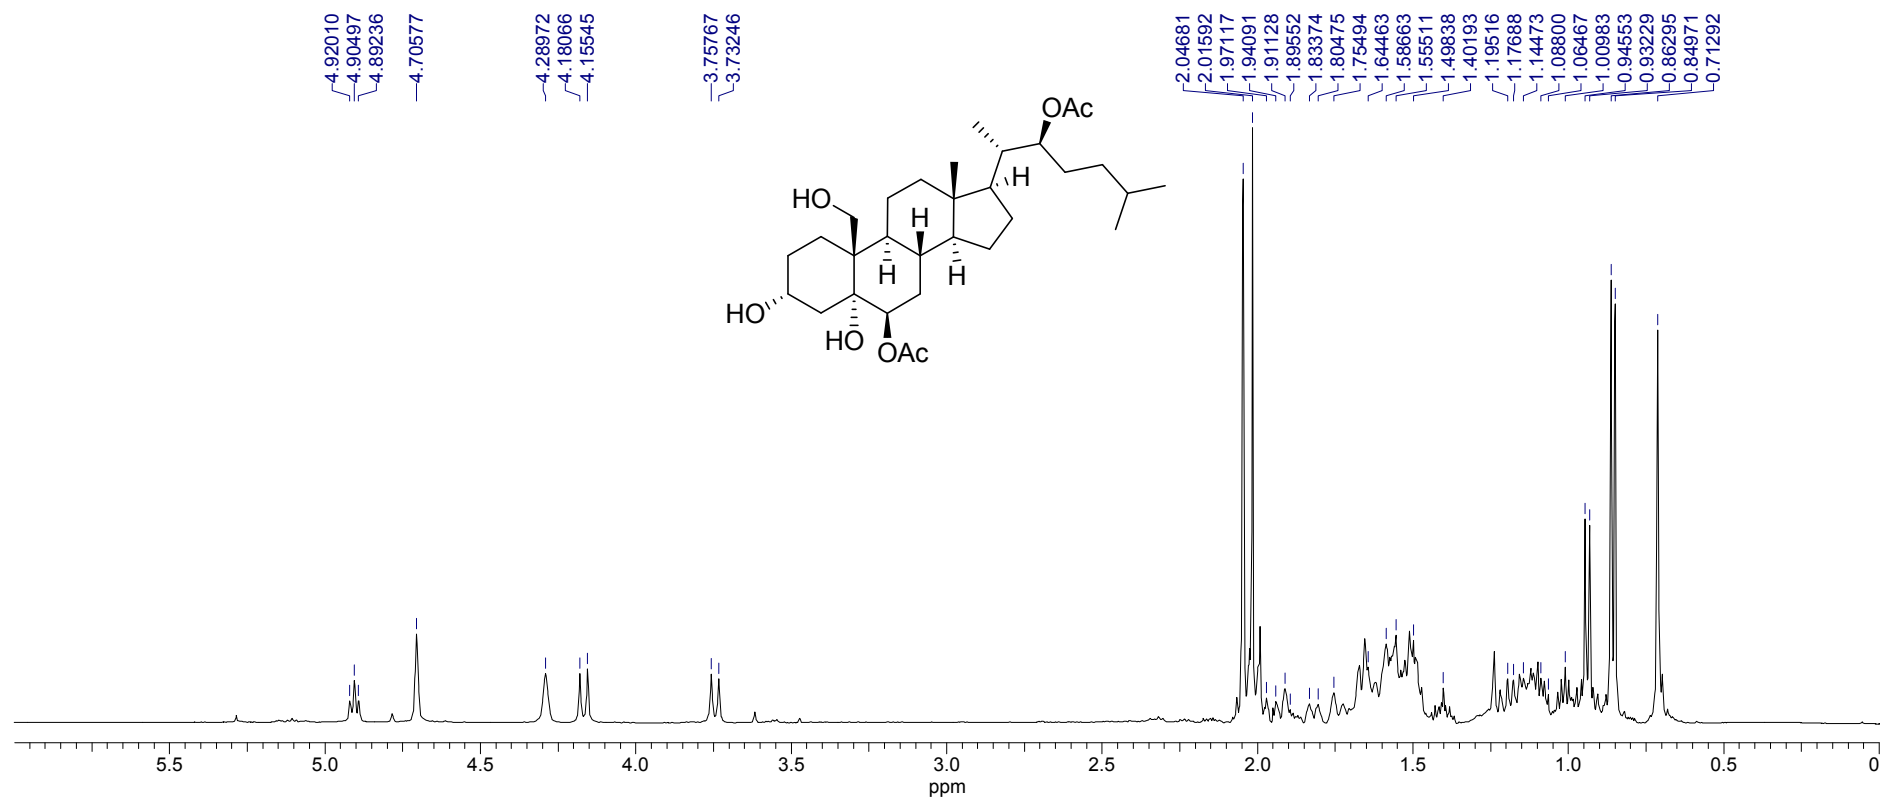

<sup>13</sup>C NMR spectrum of **3** in CDCl<sub>3</sub>

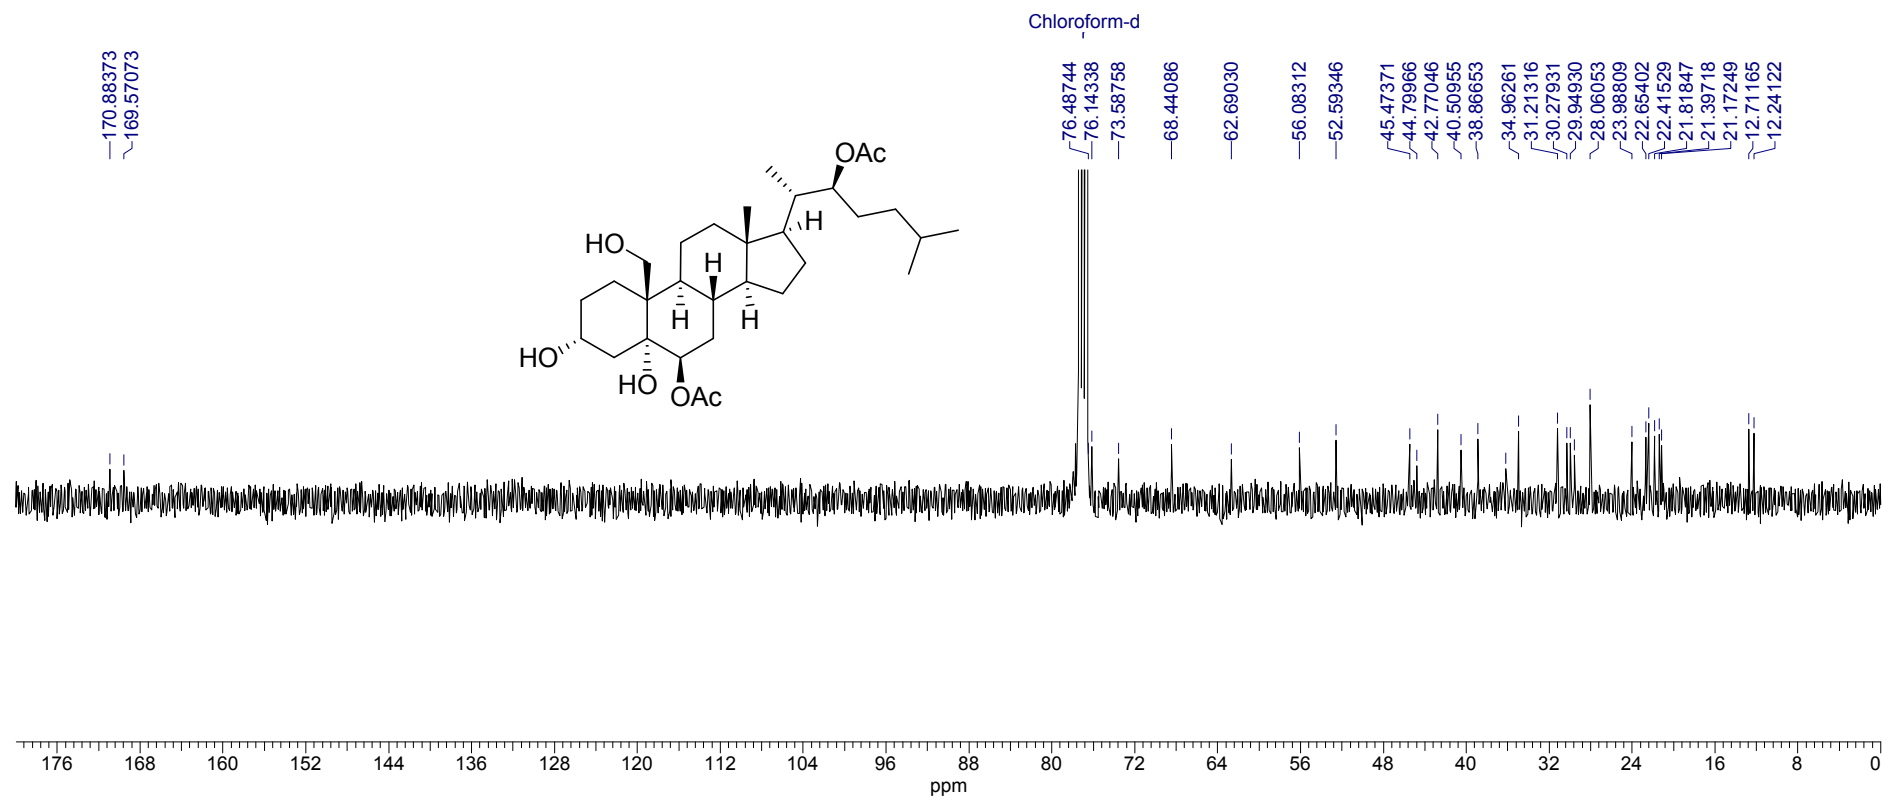

$^1\text{H}$  NMR of **4** in  $\text{CDCl}_3$

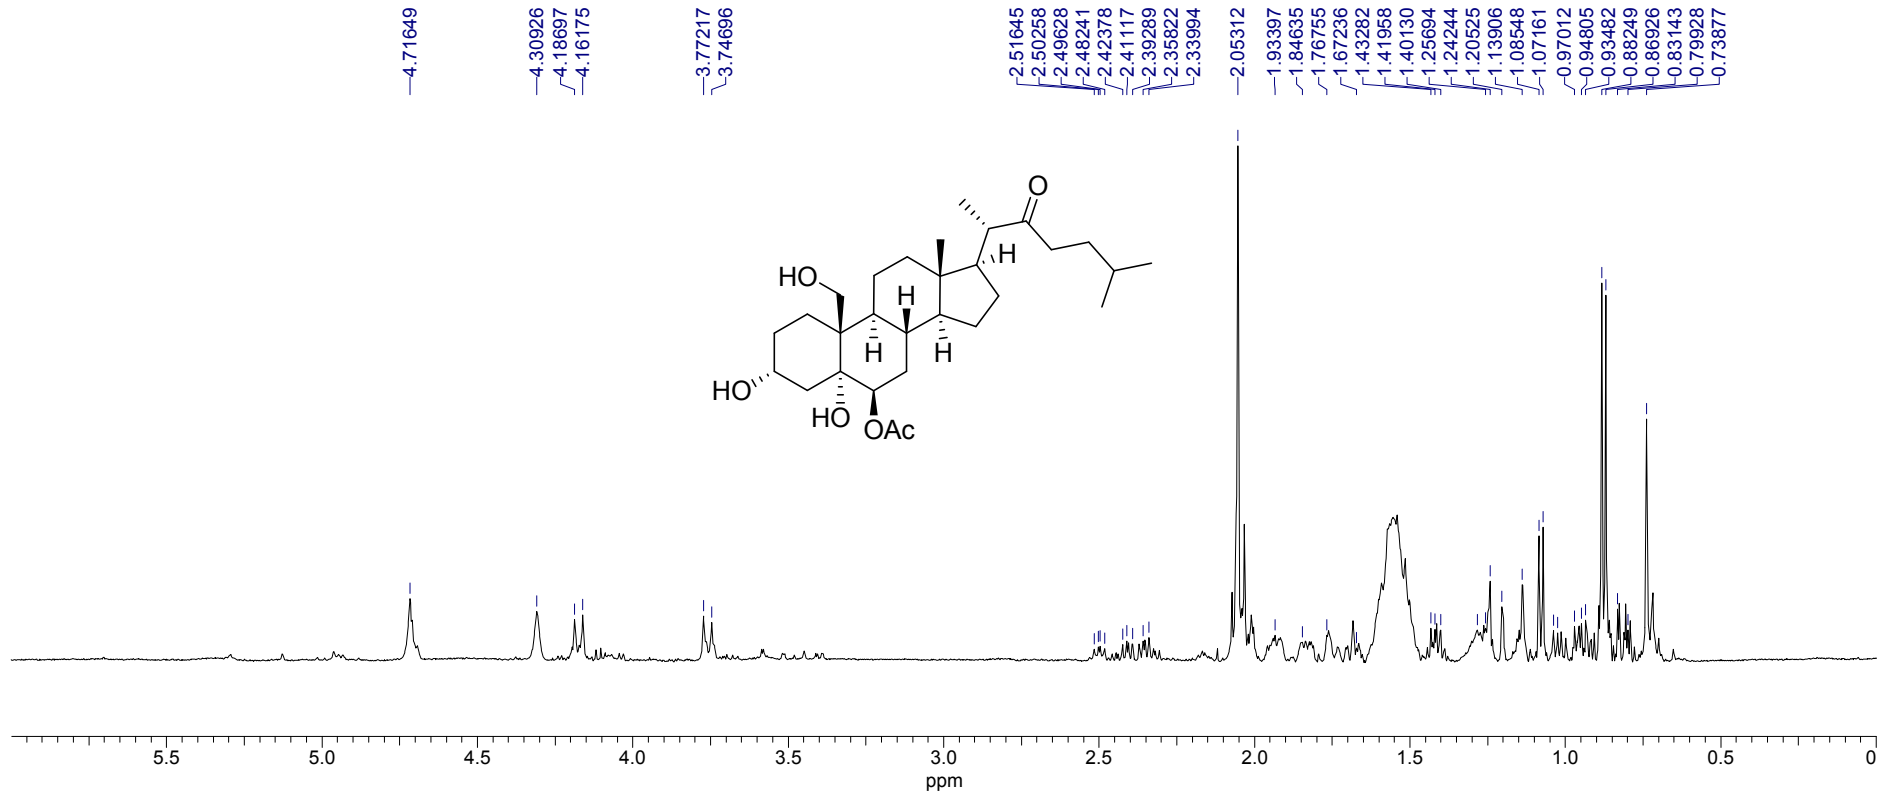



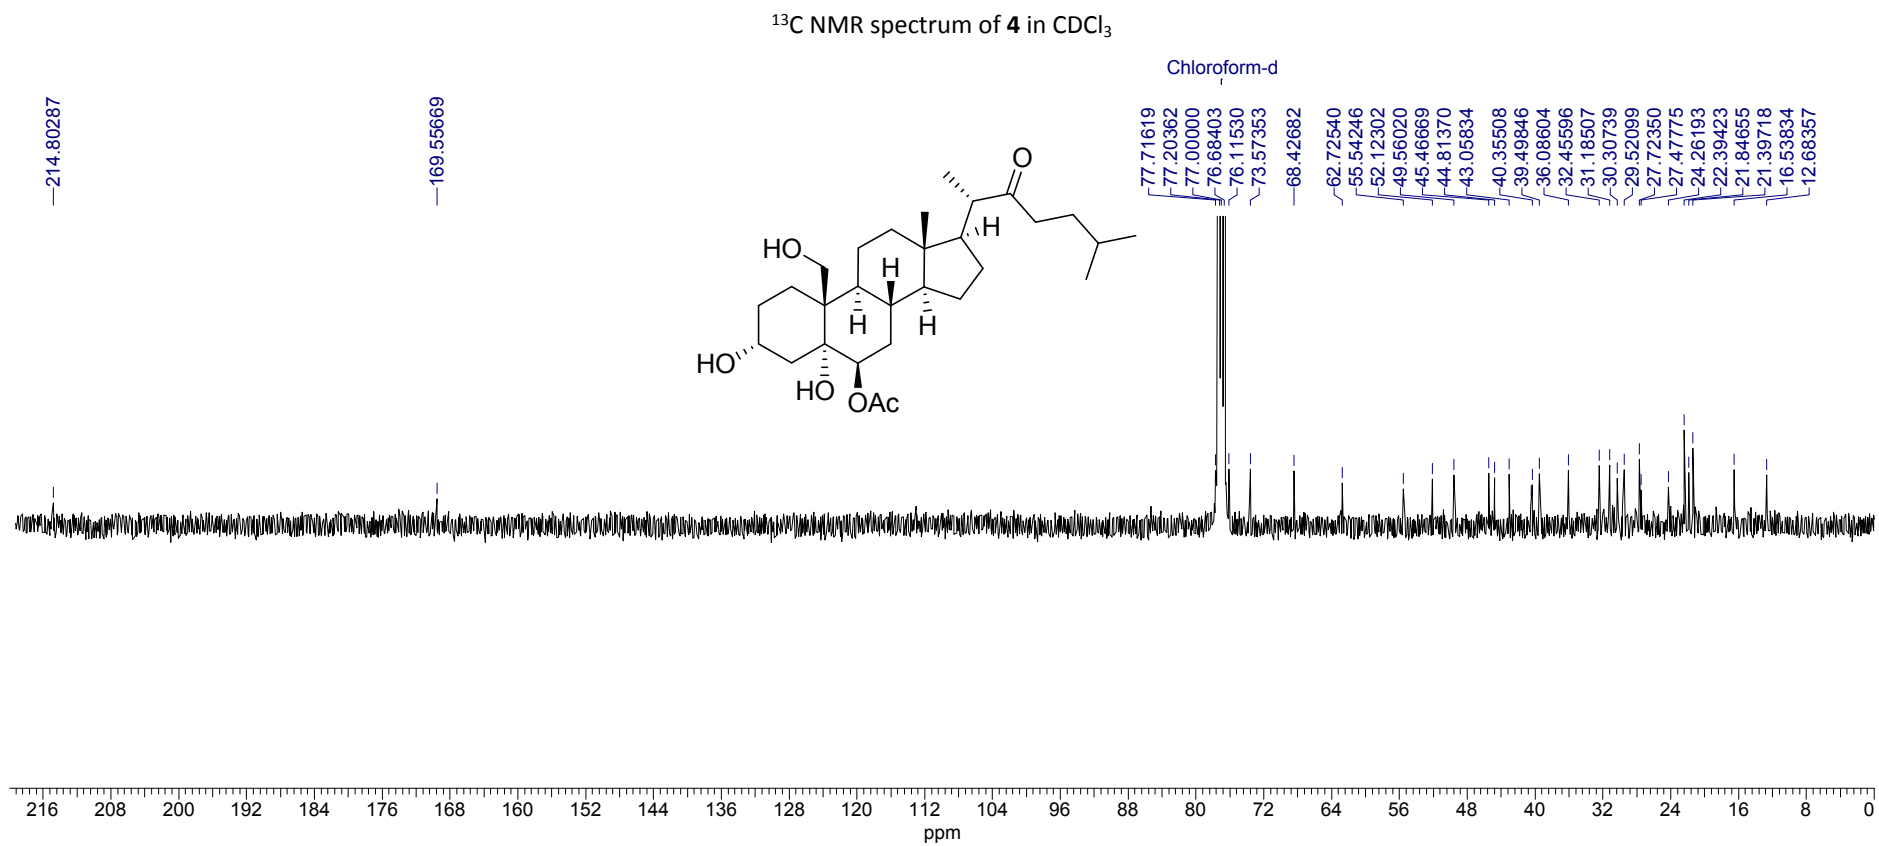

$^1\text{H}$  NMR of **5** in  $\text{CDCl}_3$

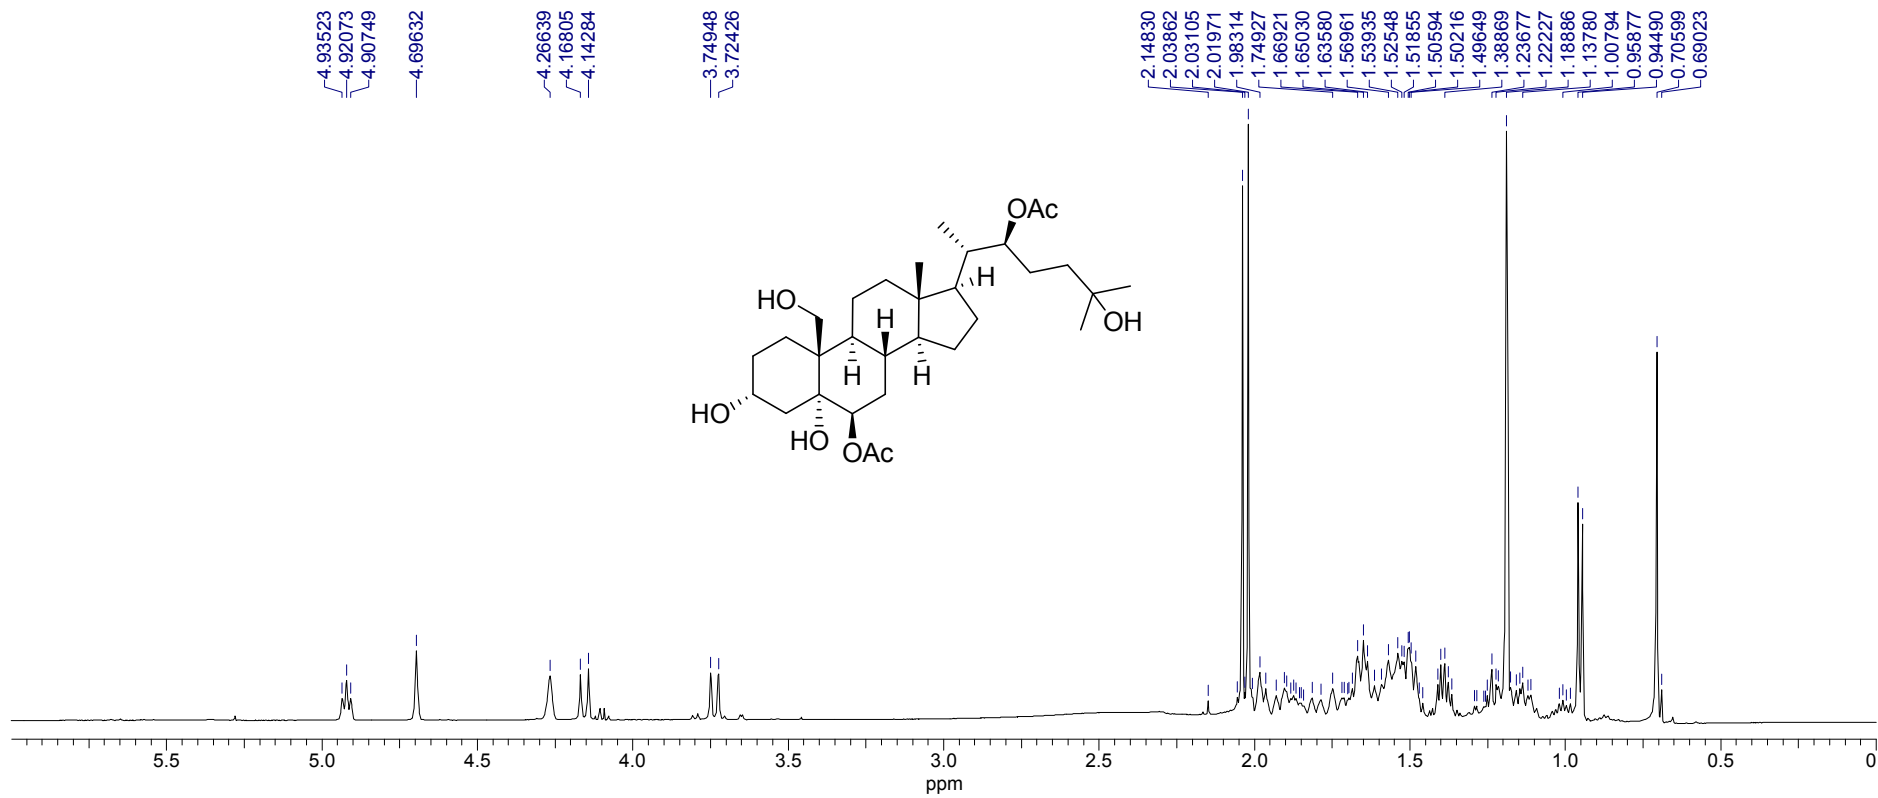

<sup>13</sup>C NMR spectrum of 5 in CDCl<sub>3</sub>

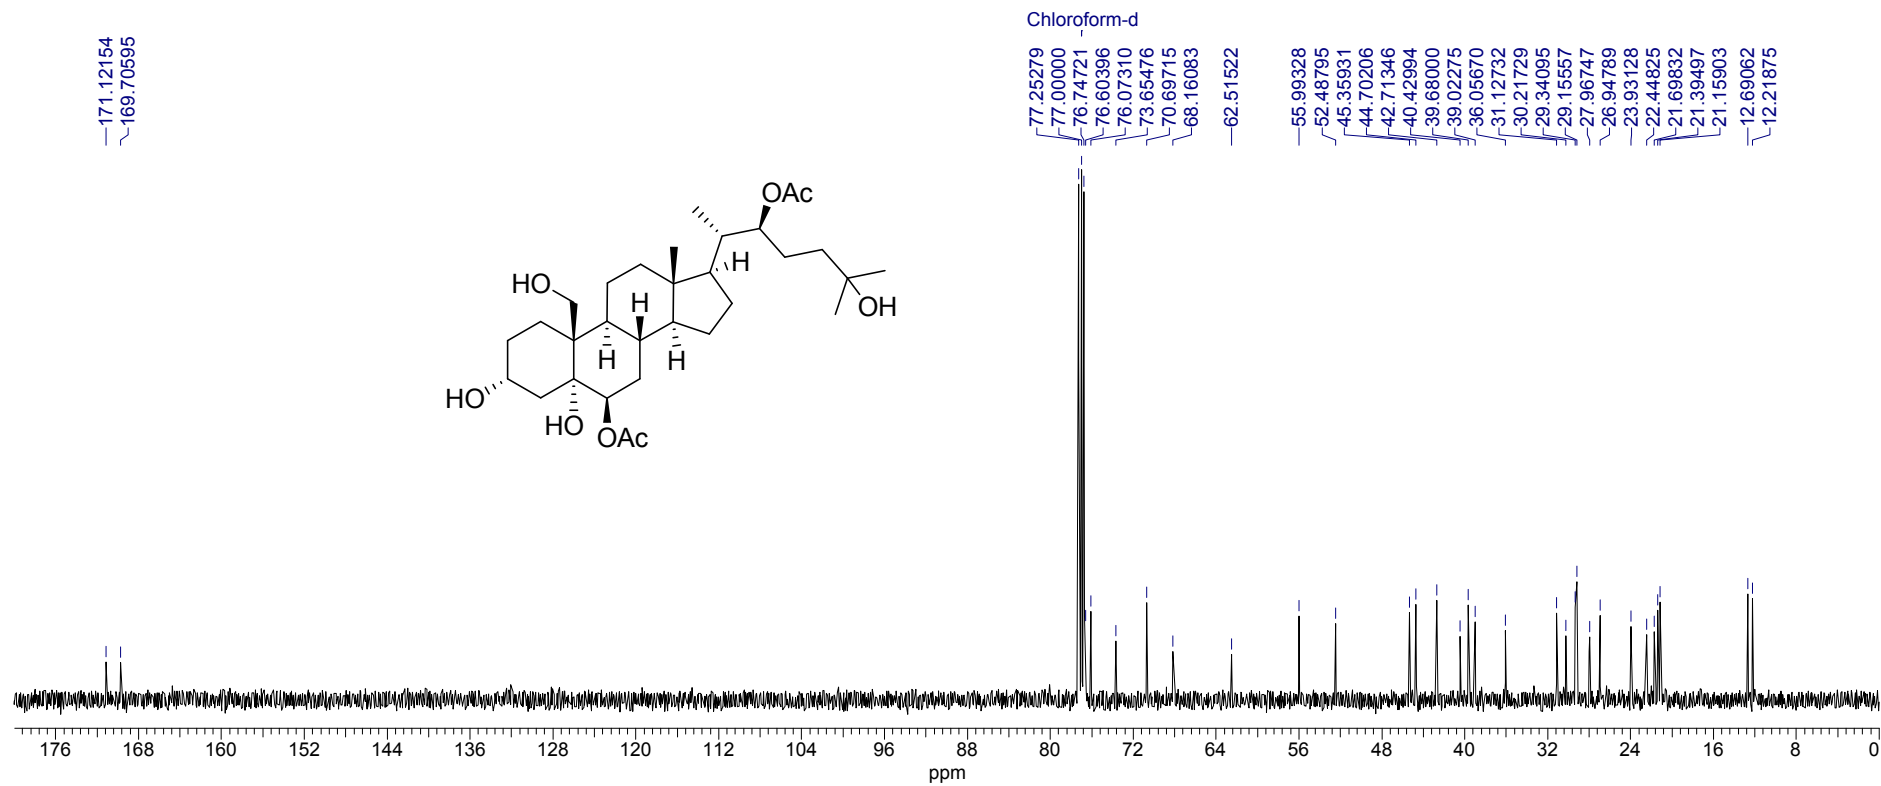

<sup>1</sup>H NMR of **6** in CDCl<sub>3</sub>

5.32040

4.95855  
4.94595  
4.93334

4.02433  
3.99974

3.82134  
3.79676

3.59756

3.34729

2.61542  
2.60722  
2.58453  
2.57633

2.06131  
2.03168  
1.91569  
1.89426  
1.78899  
1.76062  
1.71460  
1.63139  
1.58852  
1.53116  
1.40319  
1.31368  
1.26135  
1.23299  
1.19895  
1.05774  
1.03946  
0.97201  
0.95877  
0.86800  
0.71607

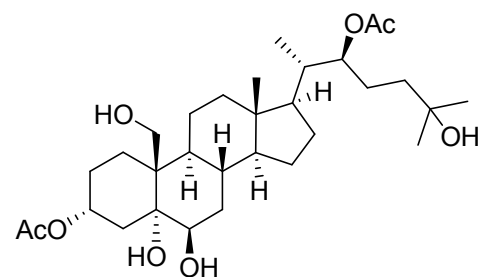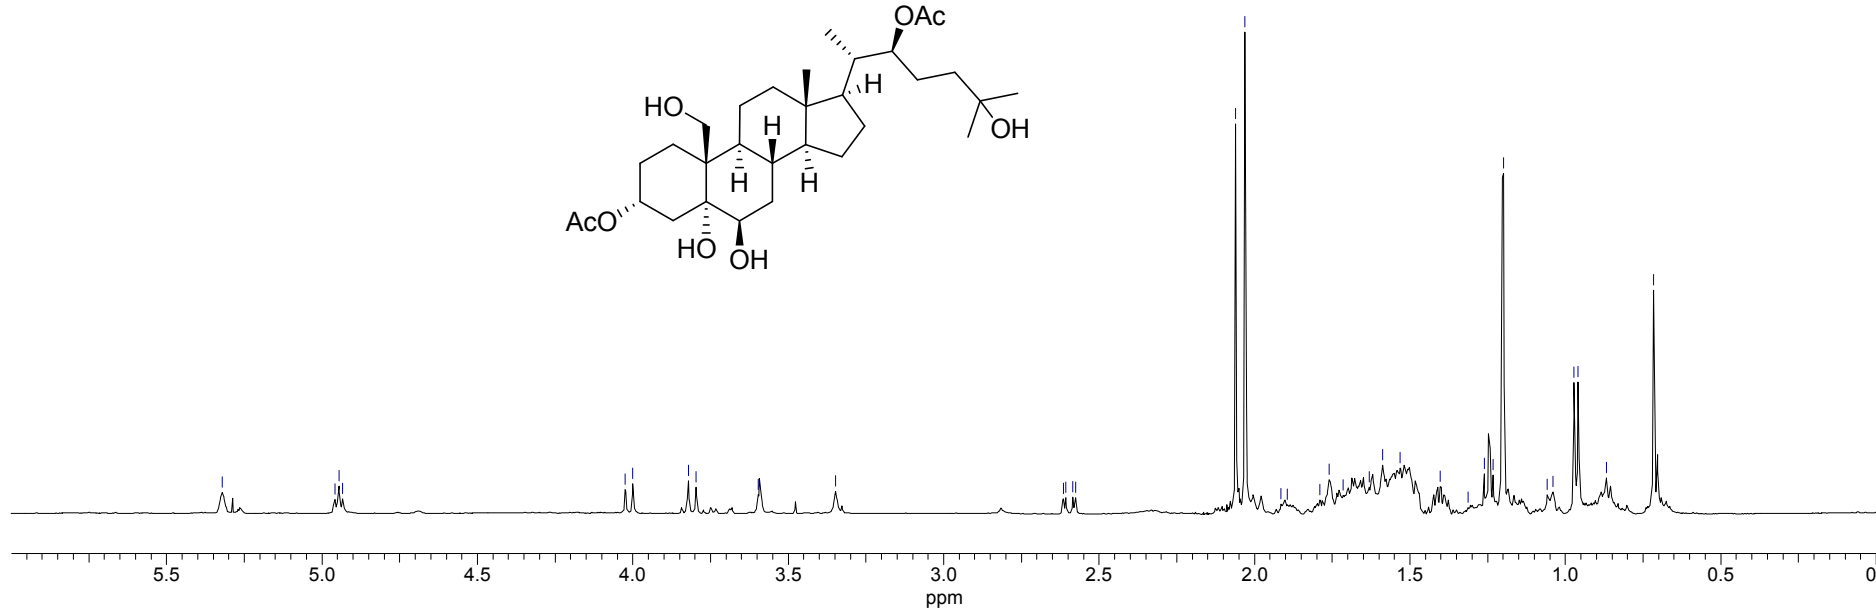

<sup>13</sup>C NMR spectrum of **6** in CDCl<sub>3</sub>

Chloroform-d

170.83458  
169.36709

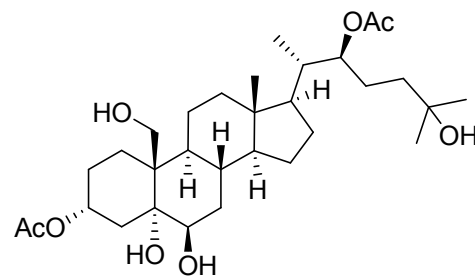

78.52365  
77.72320  
77.32298  
76.99999  
76.68403  
76.47339  
76.42424  
75.79933  
66.94529  
62.66221

52.51622  
48.55612  
46.67438  
42.59492  
40.69210  
38.92270  
34.96261  
34.66069  
33.68470  
30.85506  
29.99845  
29.47184  
28.04648  
25.82771  
23.93894  
22.63295  
22.41529  
21.36909  
21.18653  
20.26672  
12.73974  
11.17395

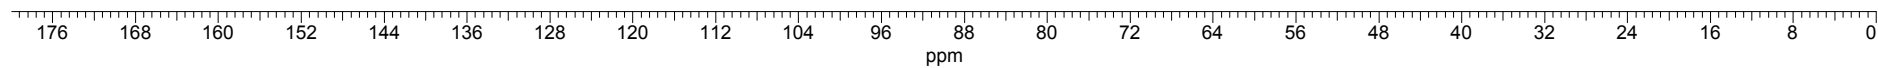

$^1\text{H}$  NMR of **7** in  $\text{CDCl}_3$

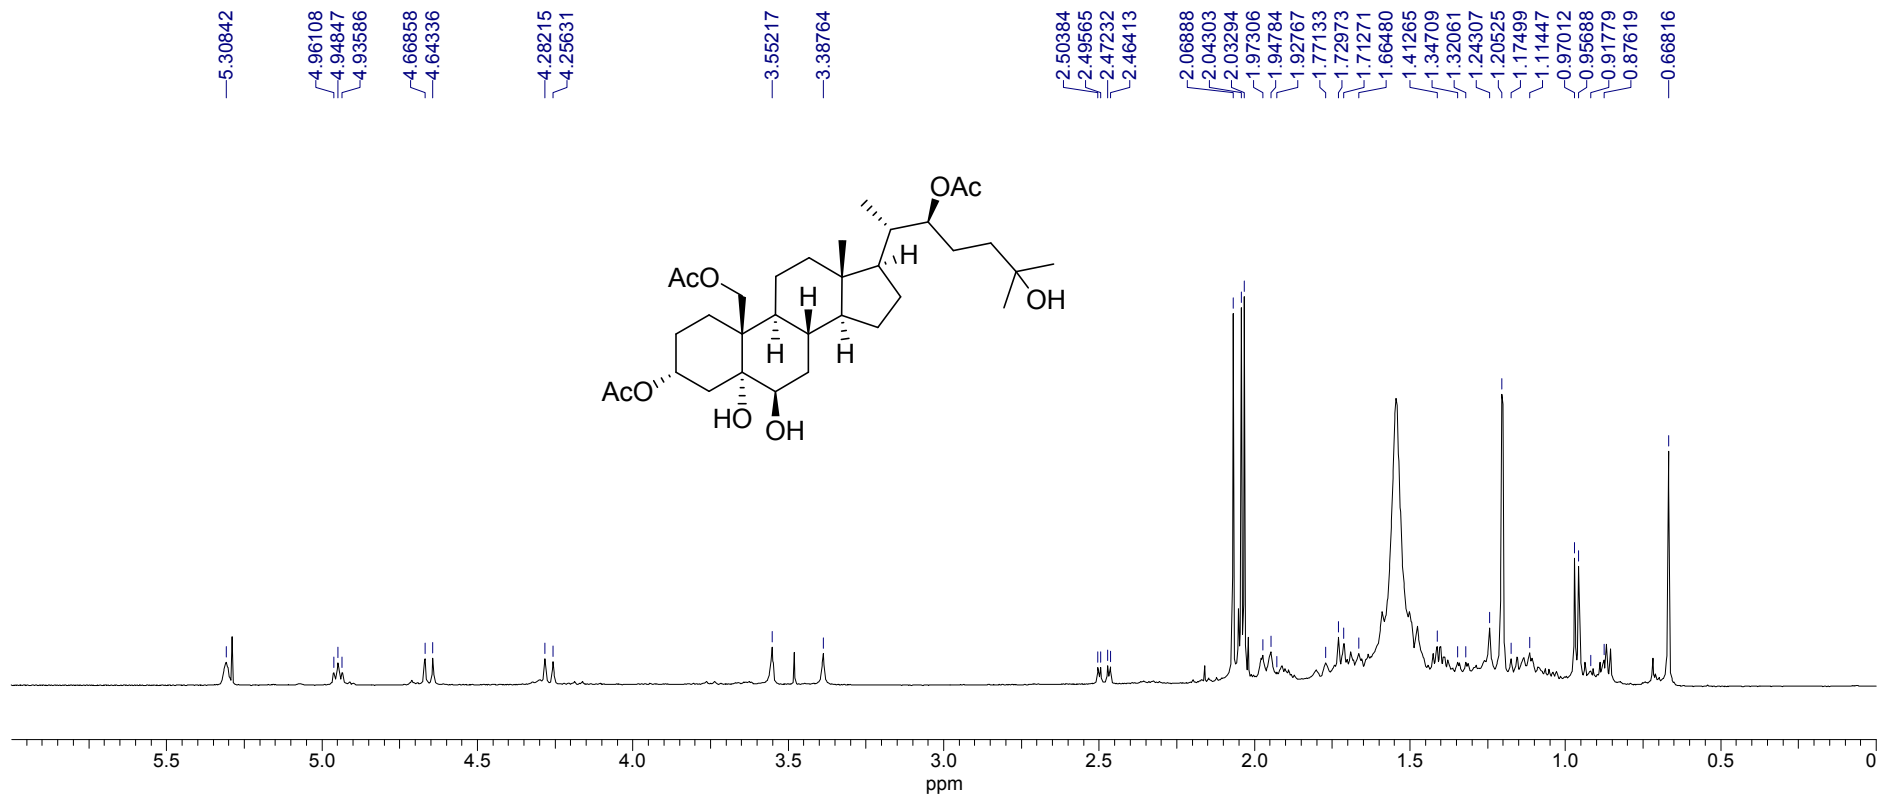

<sup>13</sup>C NMR spectrum of **7** in CDCl<sub>3</sub>

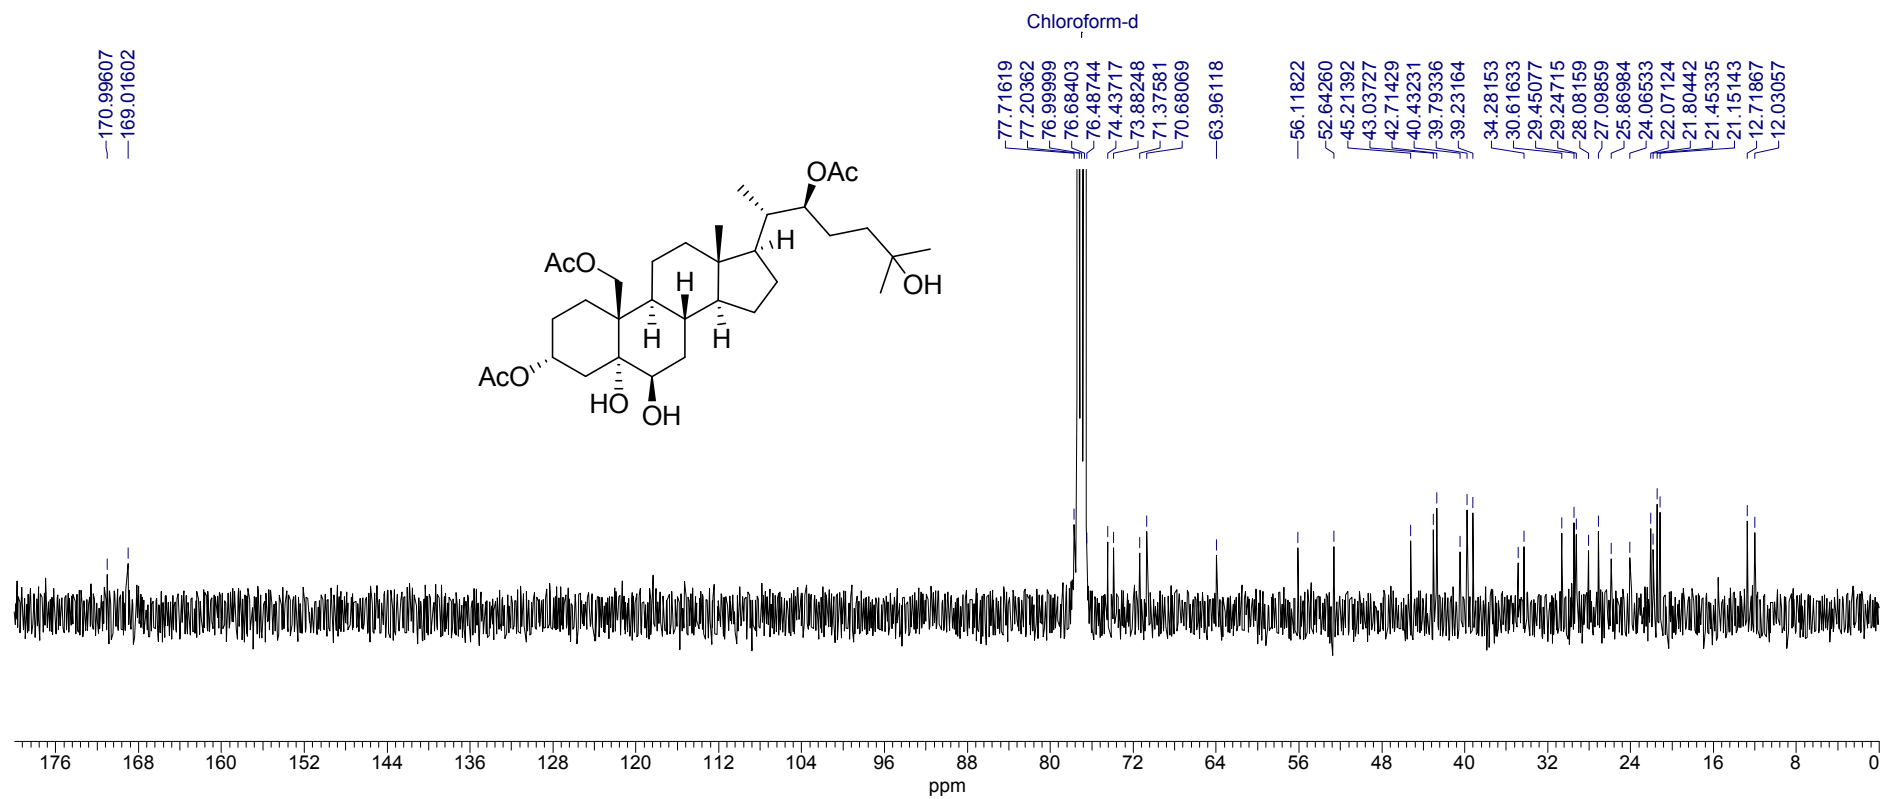

$^1\text{H}$  NMR of **8** in  $\text{CDCl}_3$

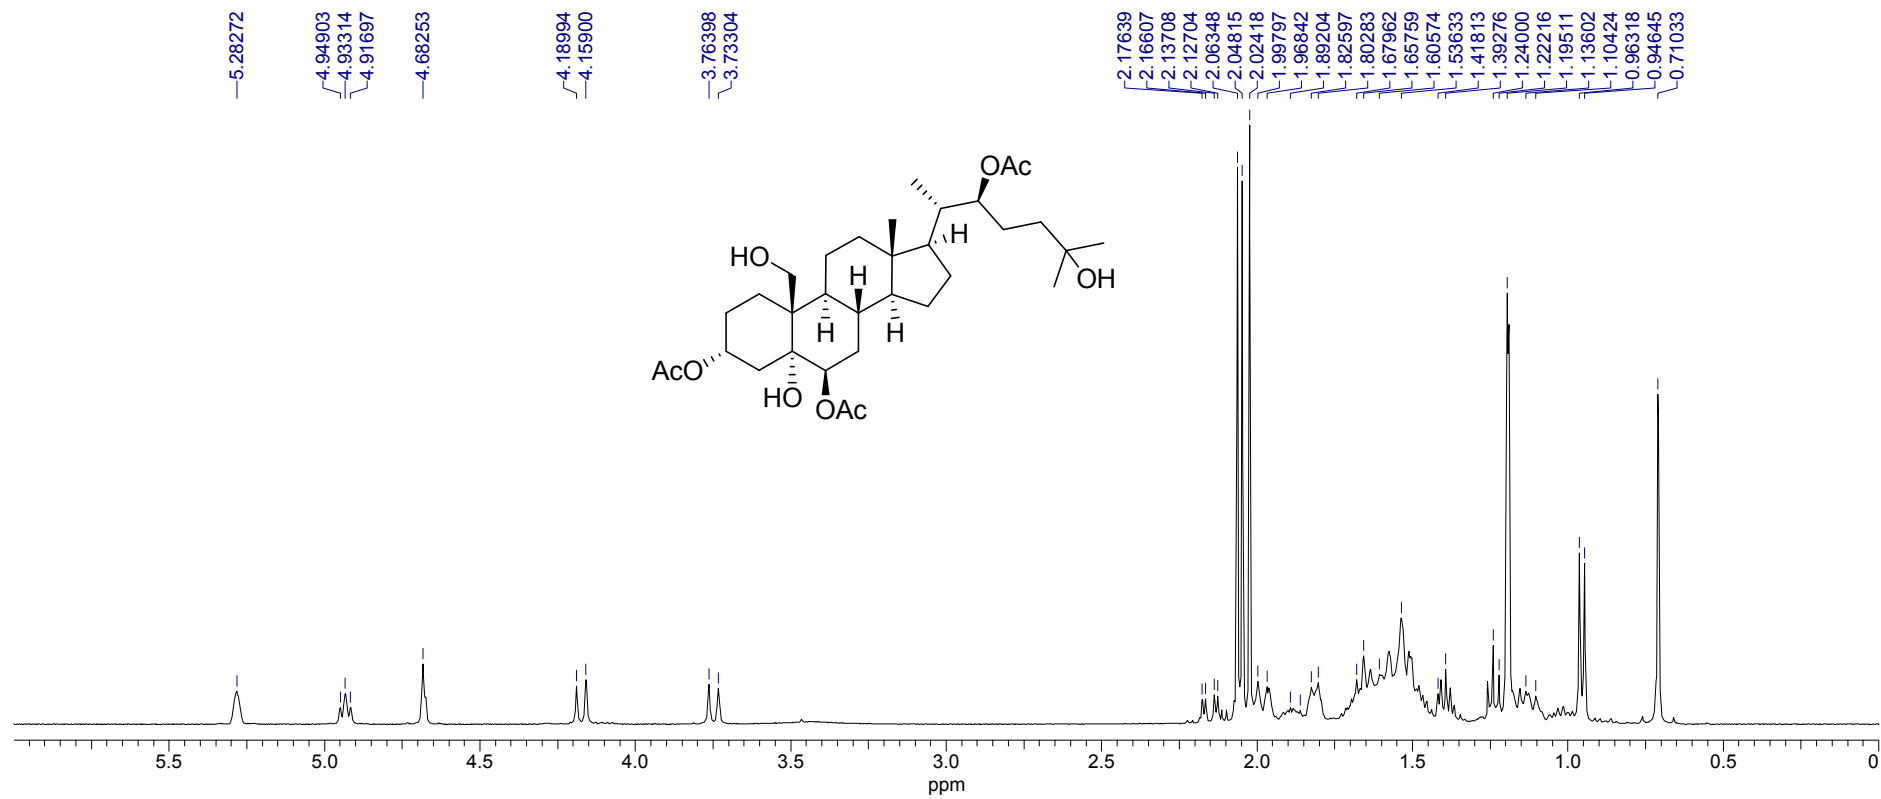



<sup>13</sup>C NMR spectrum of **8** in CDCl<sub>3</sub>

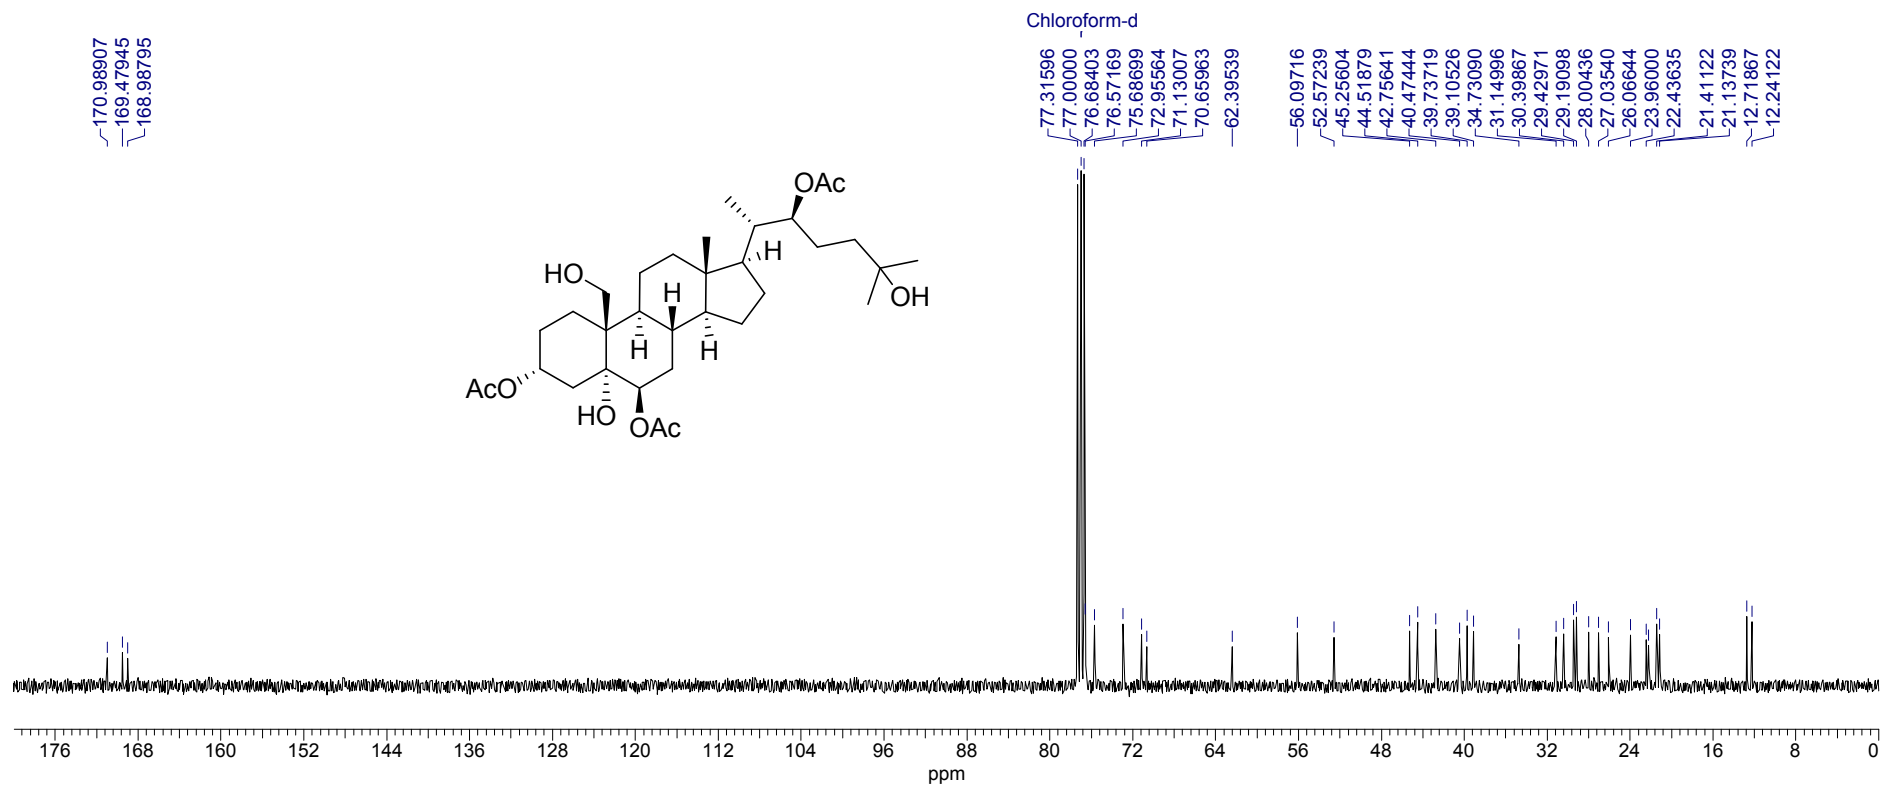

$^1\text{H}$  NMR of **9** in  $\text{CDCl}_3$

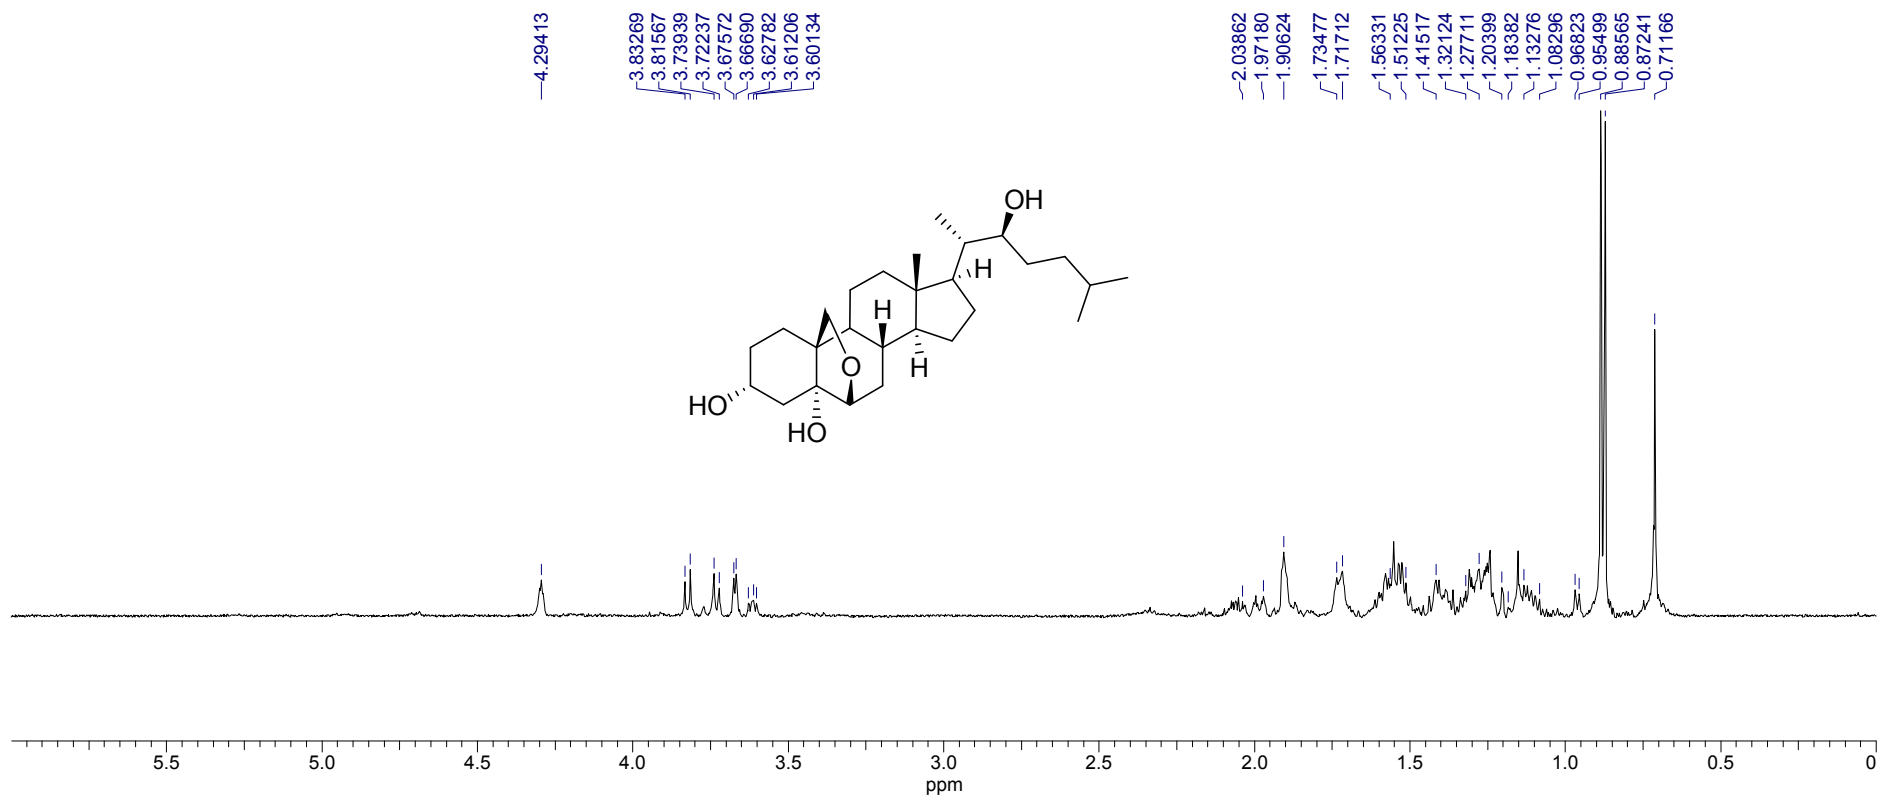

<sup>13</sup>C NMR spectrum of **9** in CDCl<sub>3</sub>

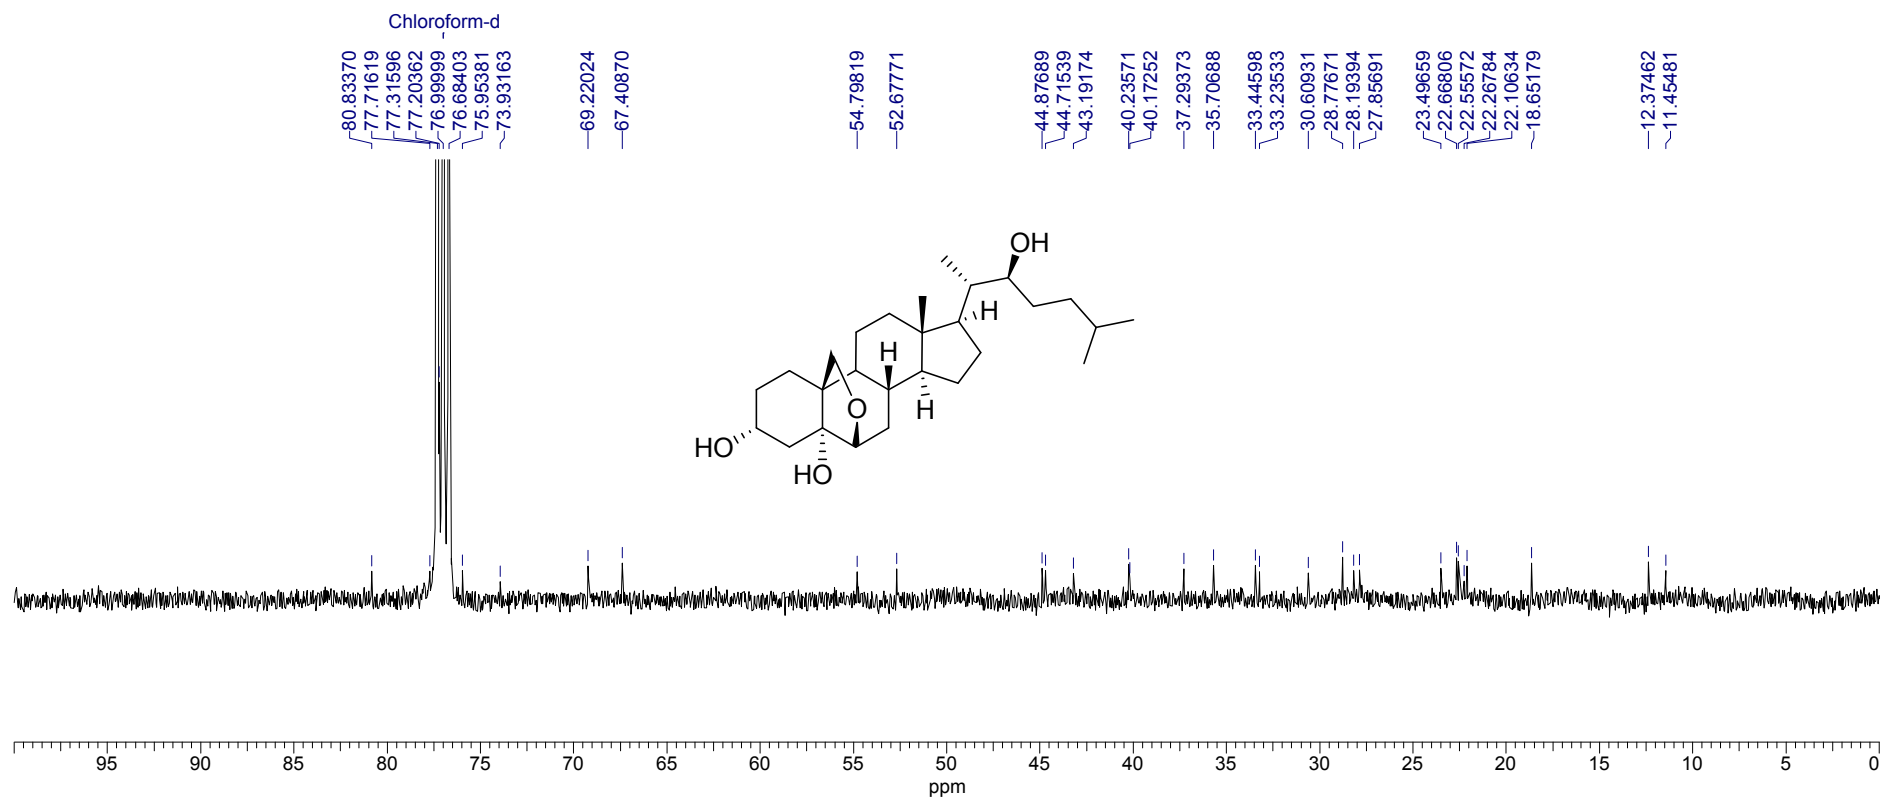

<sup>1</sup>H NMR of **10** in CDCl<sub>3</sub>

4.92893  
4.91380  
4.89804

4.29287

3.82513  
3.80874  
3.73561  
3.71922  
3.66249

2.16154  
2.07077  
2.01718  
1.90624  
1.89678  
1.73414

1.53809  
1.51729  
1.41454  
1.37545

1.09682  
0.99659  
0.94994  
0.93608  
0.86799  
0.85476  
0.70220

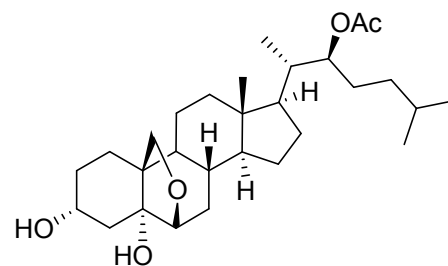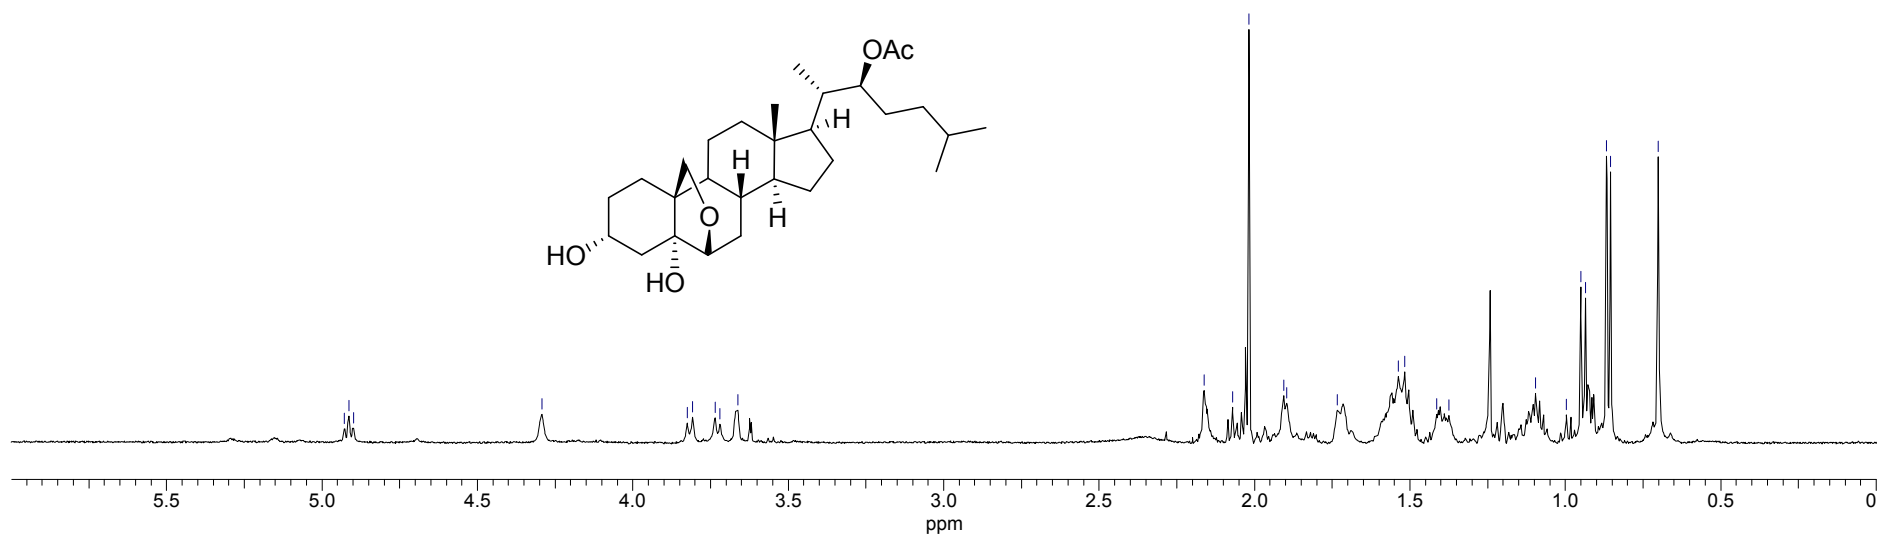

<sup>13</sup>C NMR spectrum of **10** in CDCl<sub>3</sub>

Chloroform-d

—170.85565

80.81966  
77.31596  
77.00000  
76.68403  
75.95381  
69.17811  
67.39466

54.82628  
52.62155  
44.83476  
43.13558  
40.15146  
38.83845  
37.30075  
34.94857  
33.41087  
30.59527  
29.92824  
28.75565  
28.17288  
28.05351  
23.48957  
22.66104  
22.40827  
22.07826  
21.16547  
18.67286  
12.66250  
12.22717

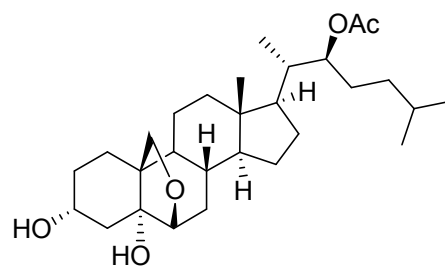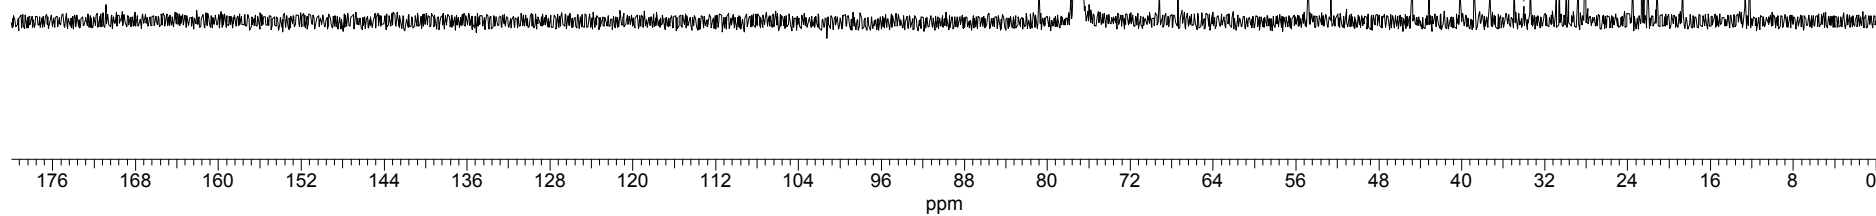

<sup>1</sup>H NMR of **11** in CDCl<sub>3</sub>

4.95414  
4.94153  
4.92893

4.29161

3.82260  
3.80558  
3.73372  
3.71670  
3.66879  
3.66123

2.07203  
2.05122  
2.02790  
1.99197  
1.96738  
1.90308  
1.86148  
1.72595  
1.68749  
1.56079  
1.53494  
1.51855  
1.42399  
1.40004  
1.37671  
1.24181  
1.22290  
1.20273  
0.96886  
0.95499  
0.70031

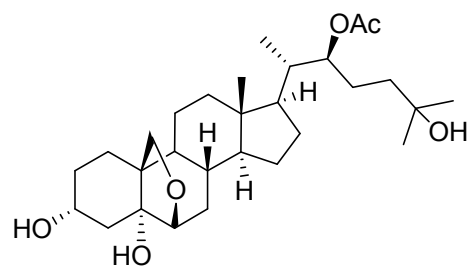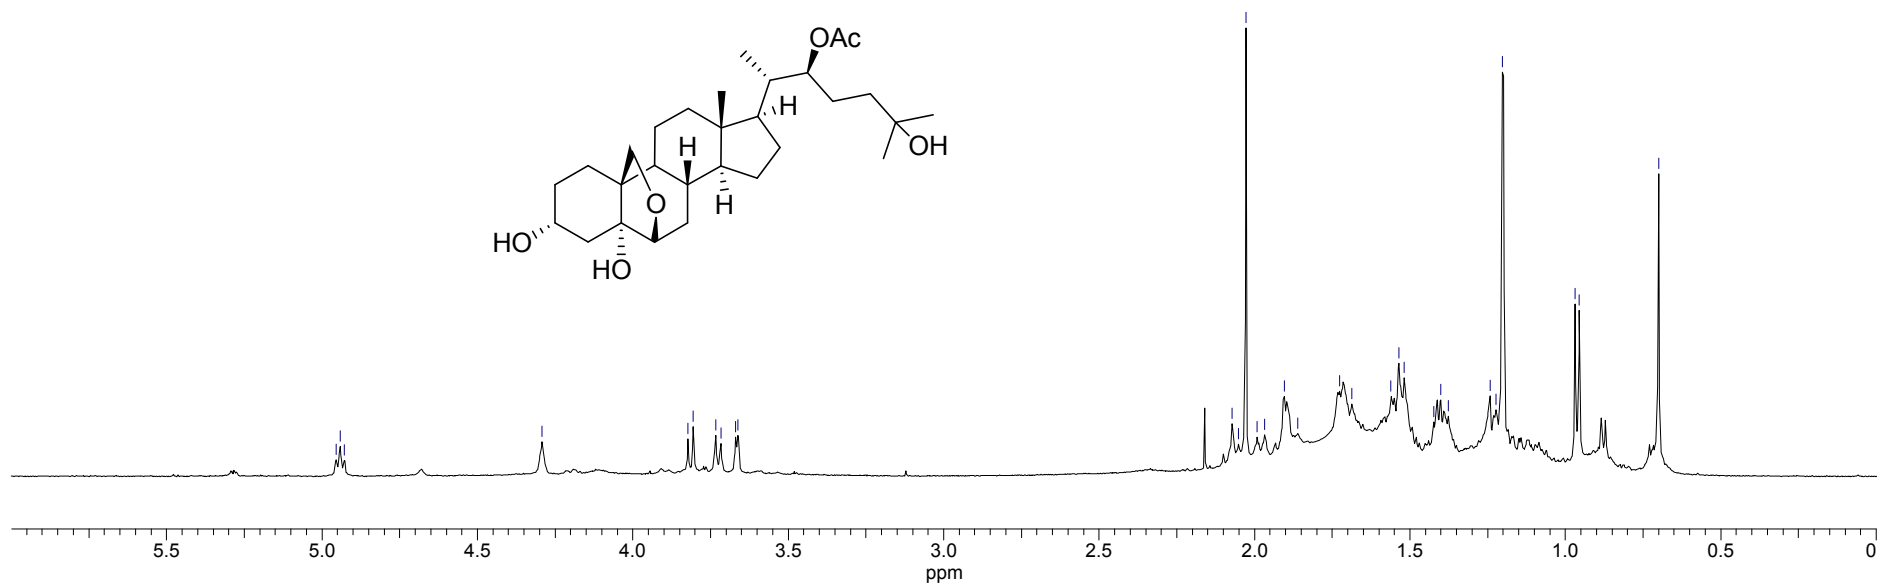

<sup>13</sup>C NMR spectrum of **11** in CDCl<sub>3</sub>

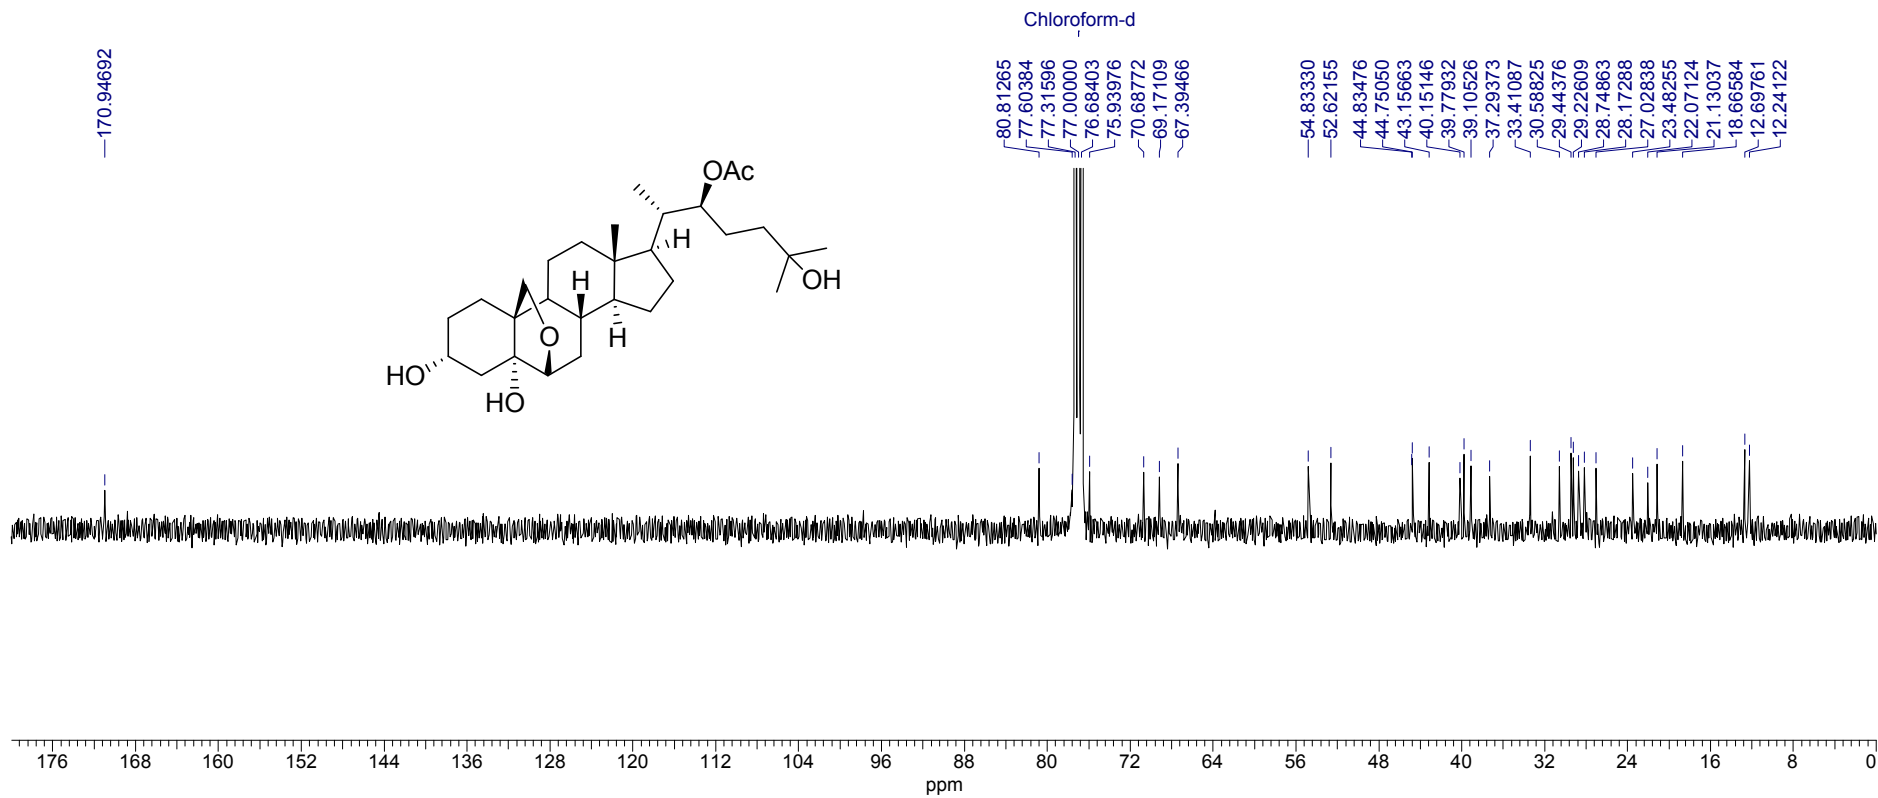

<sup>1</sup>H NMR of **12** in CDCl<sub>3</sub>

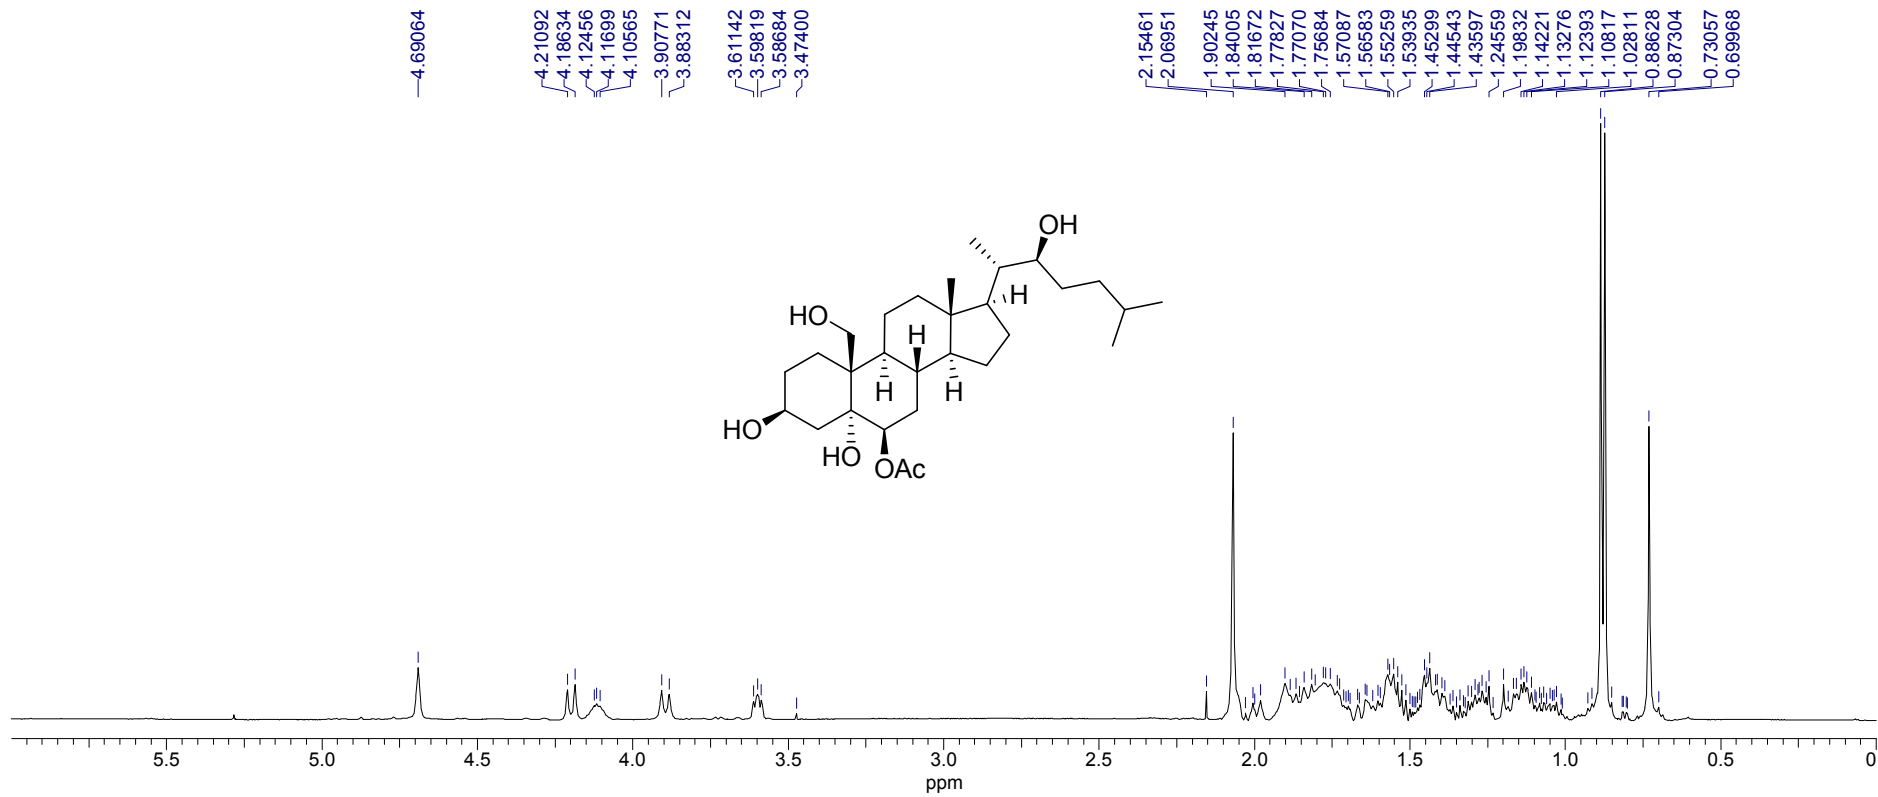



$^{13}\text{C}$  NMR spectrum of **12** in  $\text{CDCl}_3$

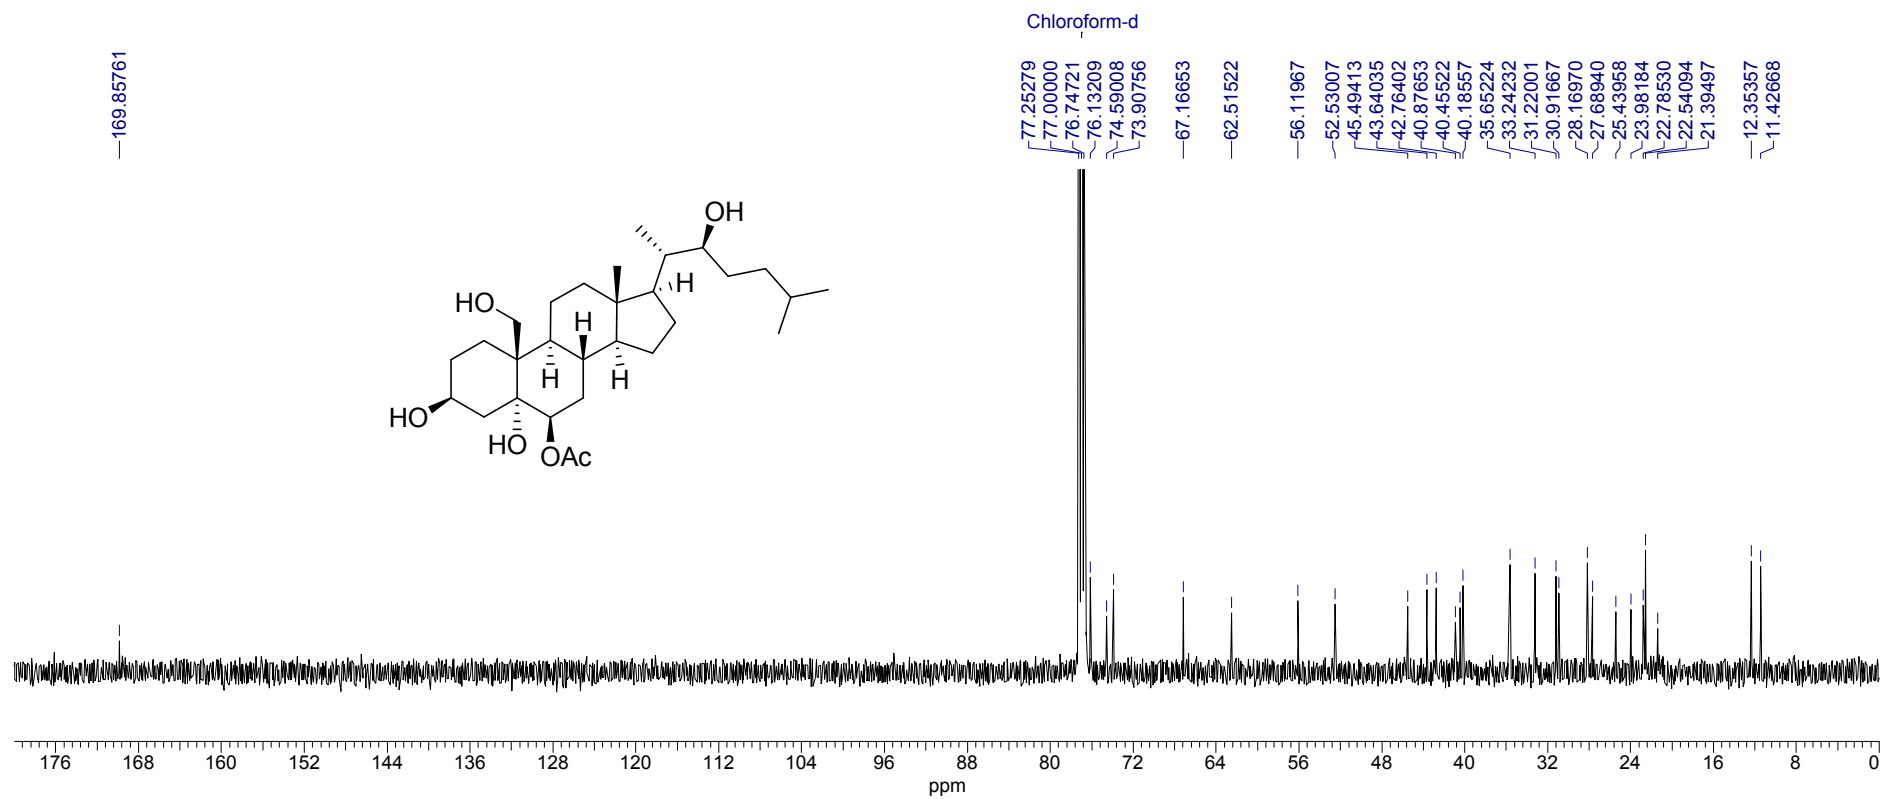

<sup>1</sup>H NMR of **13** in CDCl<sub>3</sub>

5.16658  
5.15586  
5.14452  
5.13380  
5.12245  
5.11111  
5.10039

4.65597

4.22101  
4.19579

3.90014  
3.87493

3.61710  
3.60512  
3.59314

2.07203  
2.00332  
1.89111  
1.87346  
1.85076  
1.72280  
1.70704  
1.69695  
1.68434  
1.54755  
1.49838  
1.46056  
1.37293  
1.35024  
1.32376  
1.27585  
1.13654  
1.03379  
0.88502  
0.87241  
0.72049

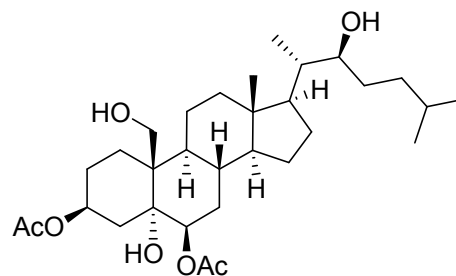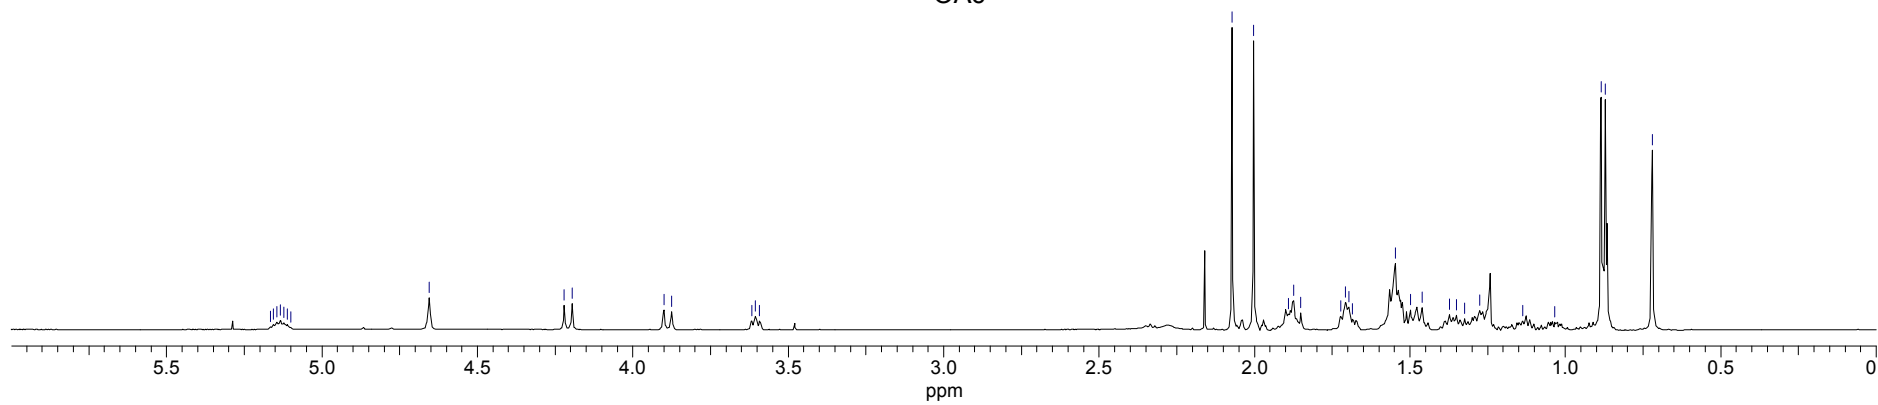

<sup>13</sup>C NMR spectrum of **13** in CDCl<sub>3</sub>

Chloroform-d

170.72224  
169.57773

77.31596  
77.00000  
76.68403  
76.42424  
74.12823  
73.92460  
70.55431

62.63413

56.15333

52.48111

45.32626

43.73240

42.77046

40.46742

40.17954

35.65071

33.24236

31.27635

30.91826

28.17990

27.70244

27.23902

25.46962

24.03022

22.73828

22.66104

21.34101

12.35356

11.42673

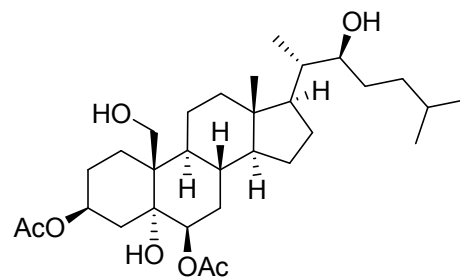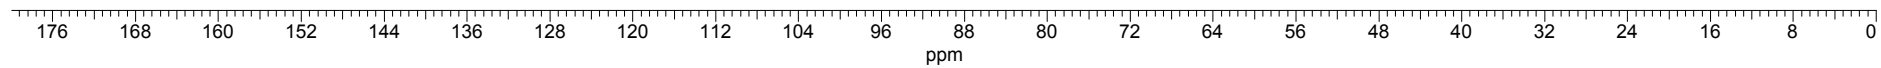

<sup>1</sup>H NMR of **14** in CDCl<sub>3</sub>

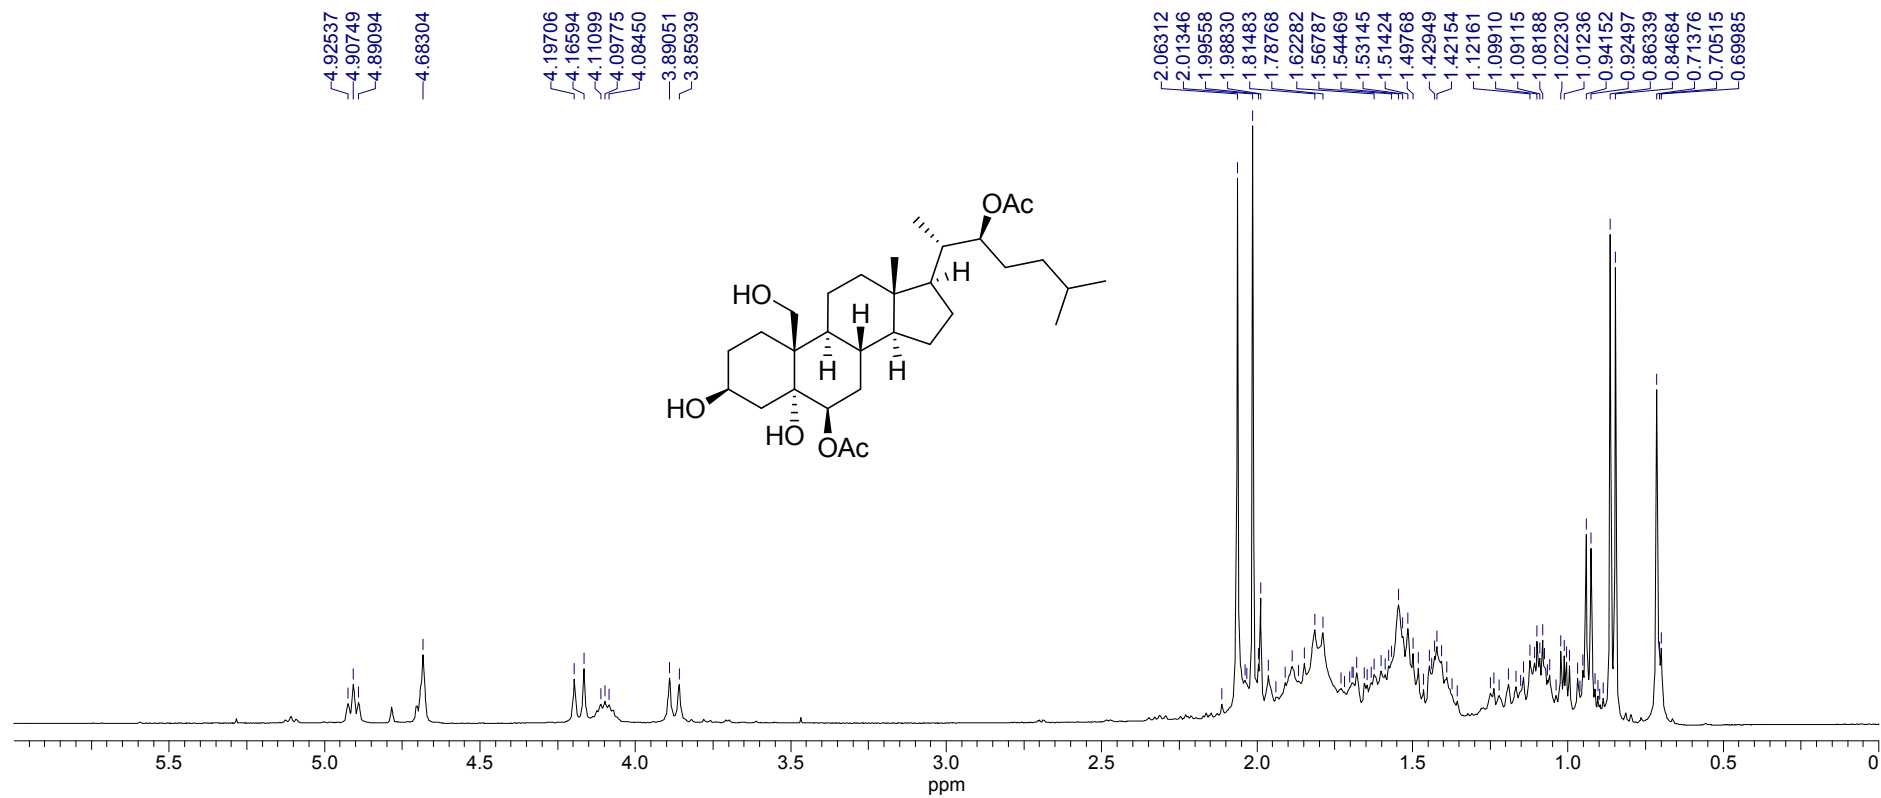

$^{13}\text{C}$  NMR spectrum of **14** in  $\text{CDCl}_3$

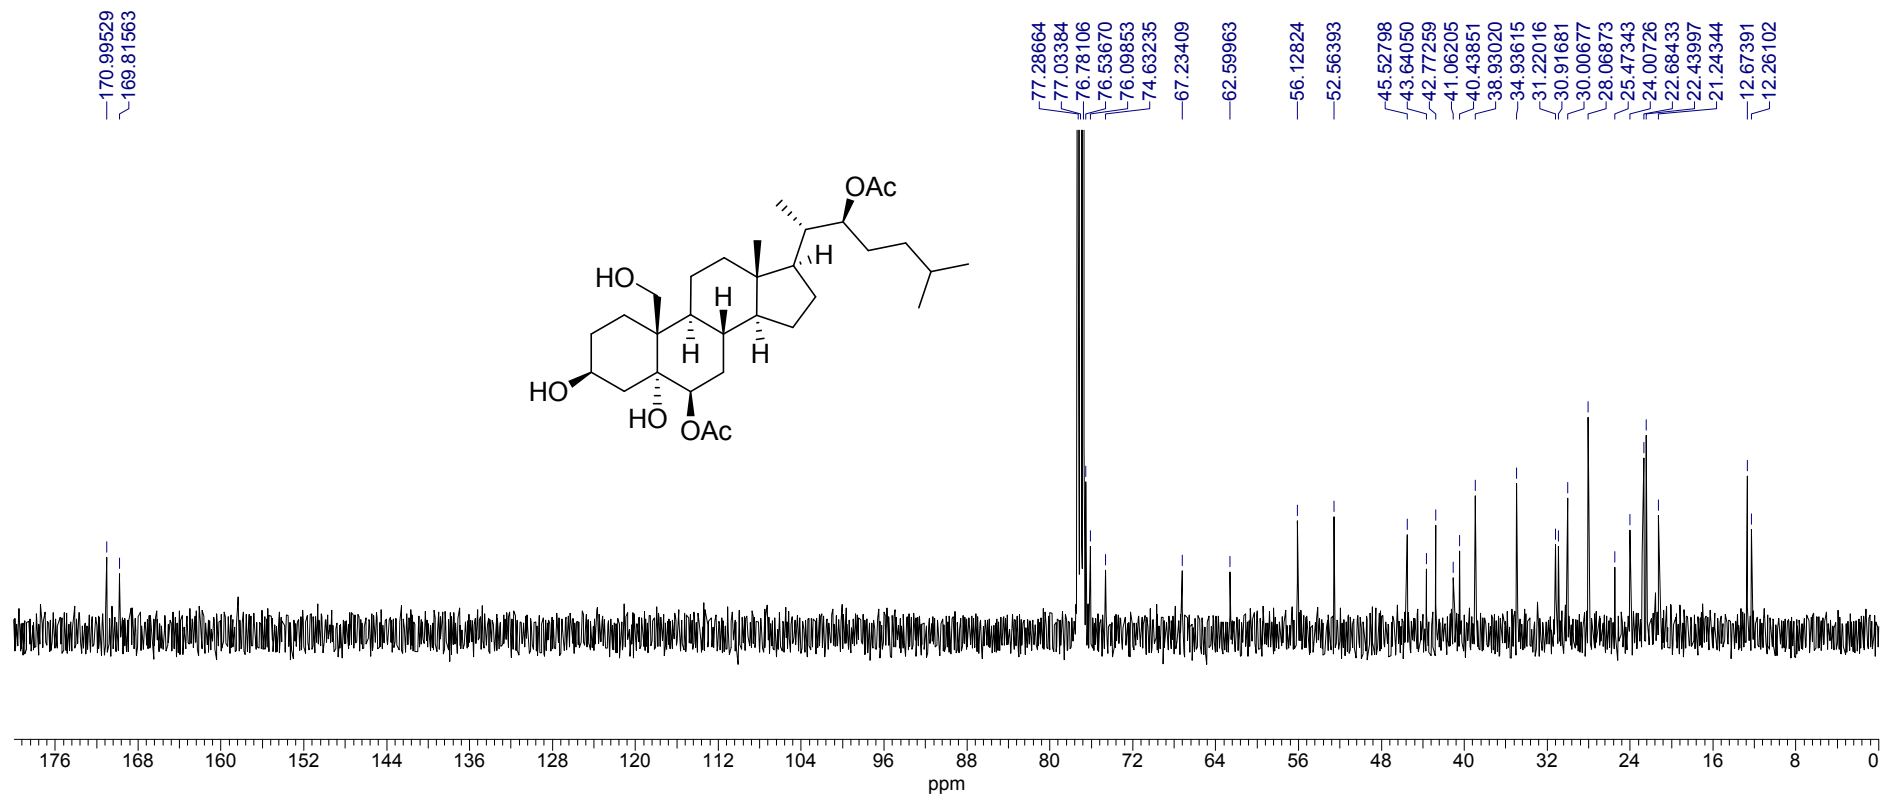

<sup>1</sup>H NMR of **15** in CDCl<sub>3</sub>

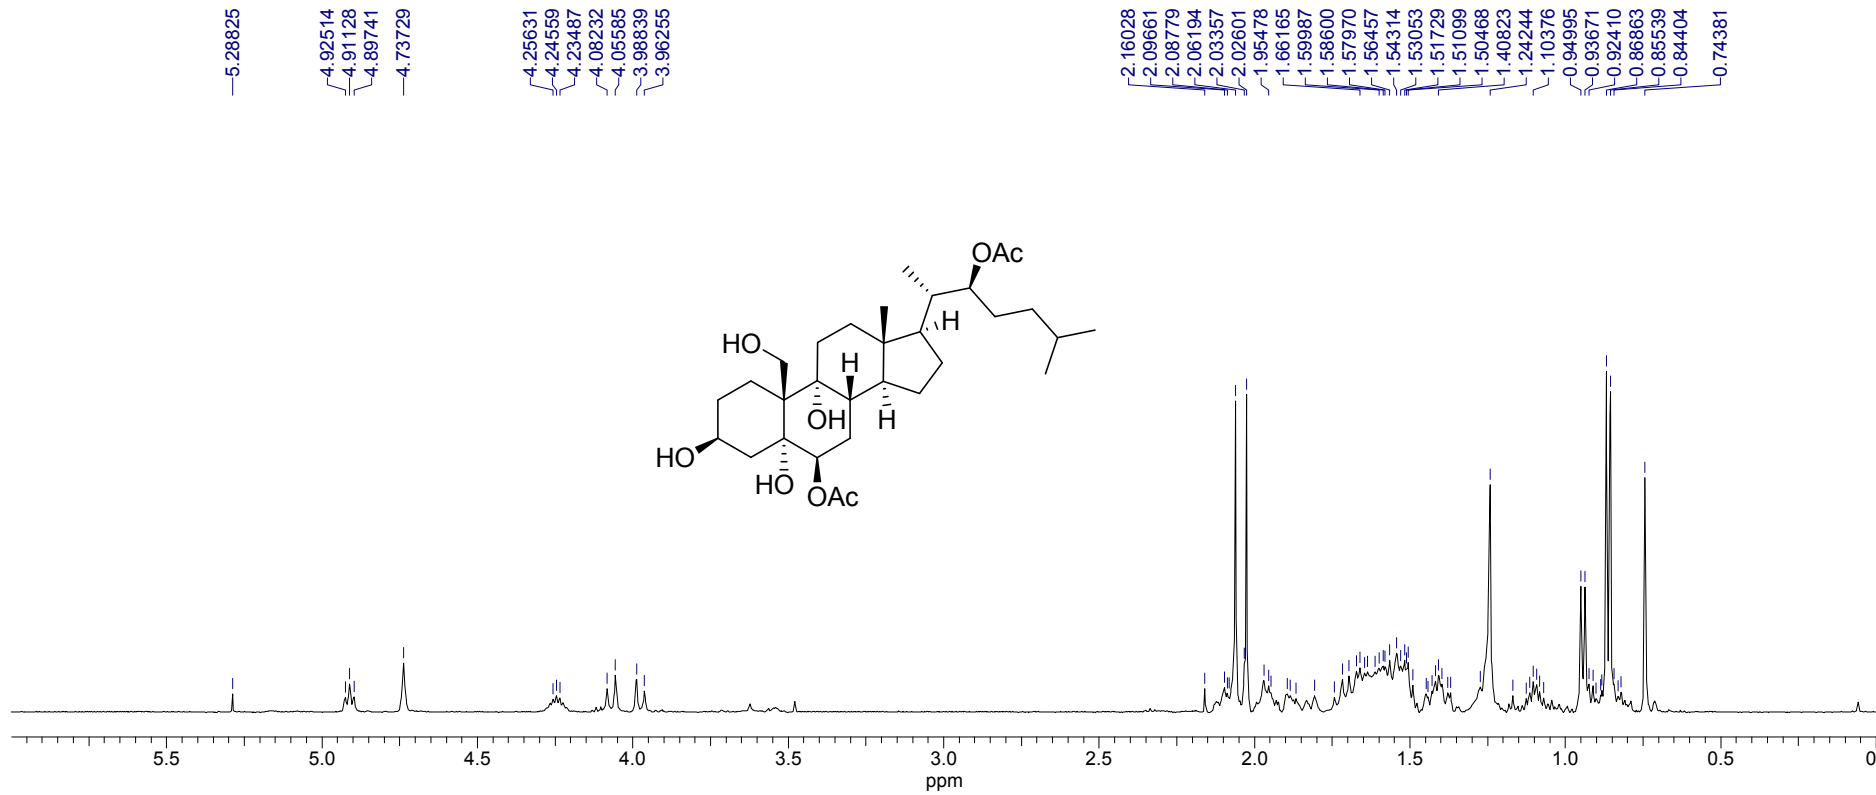

<sup>13</sup>C NMR spectrum of **15** in CDCl<sub>3</sub>

Chloroform-d

170.83458  
169.36709

78.52365  
77.72320  
77.32298  
76.99999  
76.68403  
76.47339  
76.42424  
75.79933  
66.94529  
62.66221

52.51622  
48.55612  
46.67438  
42.59492  
40.69210  
38.92270  
34.96261  
34.66069  
33.68470  
30.85506  
29.99845  
29.47184  
28.04648  
25.82771  
23.93894  
22.63295  
22.41529  
21.36909  
21.18653  
20.26672  
12.73974  
11.17395

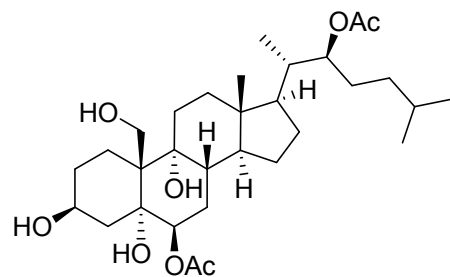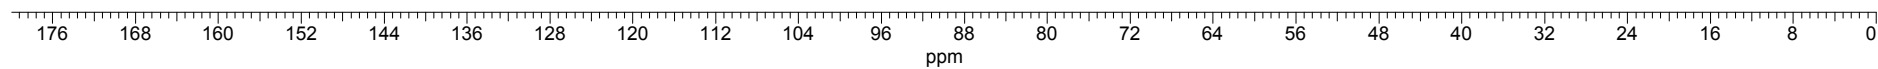

<sup>1</sup>H NMR of **16** in CDCl<sub>3</sub>

4.93082  
4.91821  
4.90560

4.22164  
4.21029  
4.18823

3.60701

2.12246  
2.09598  
2.06257  
2.02790  
1.98440  
1.96234  
1.91191  
1.84131  
1.80601  
1.78331  
1.46623  
1.42084  
1.37419  
1.25253  
1.10439  
0.95247  
0.93923  
0.87052  
0.85728  
0.70410

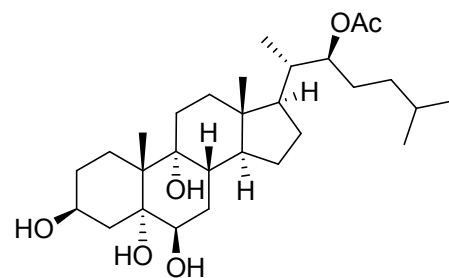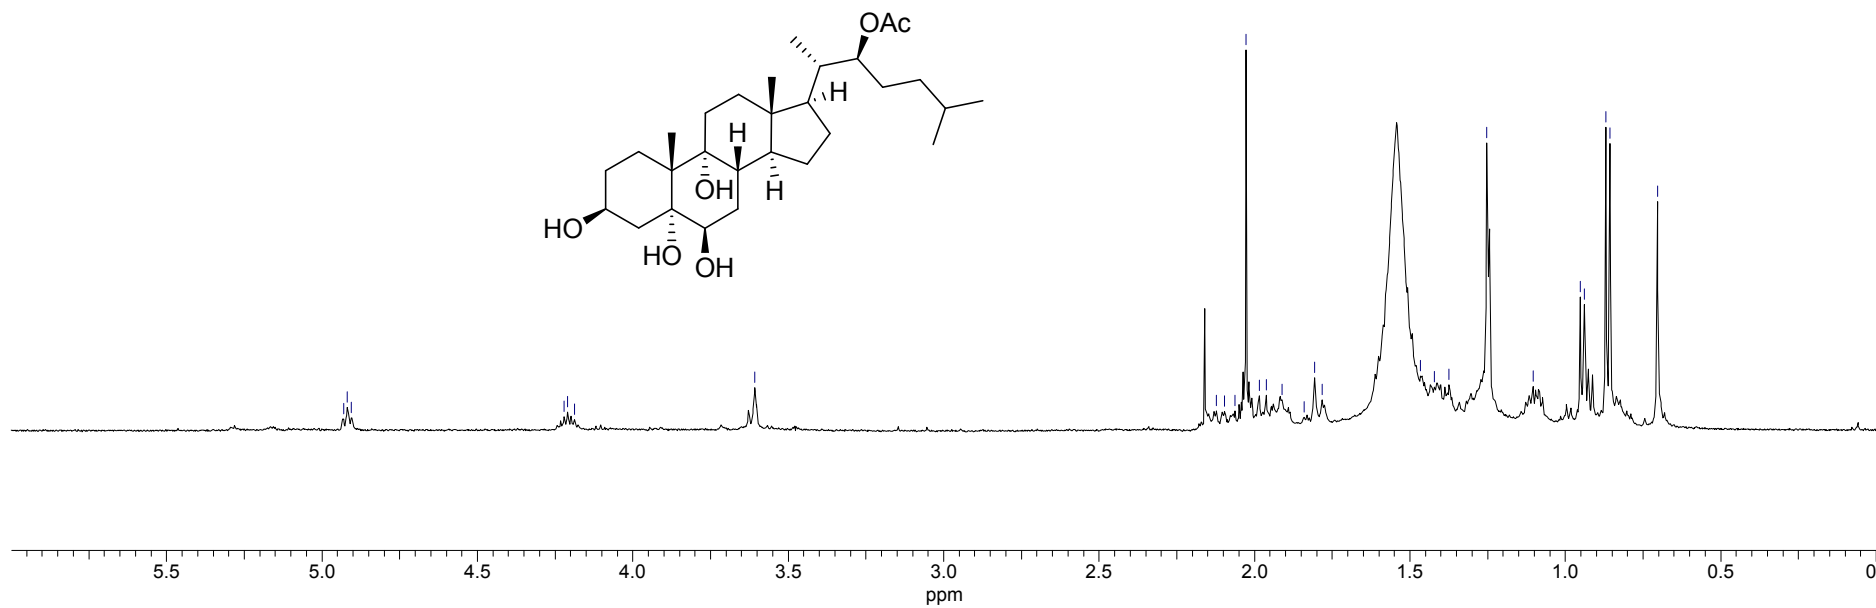



<sup>13</sup>C NMR spectrum of **16** in CDCl<sub>3</sub>

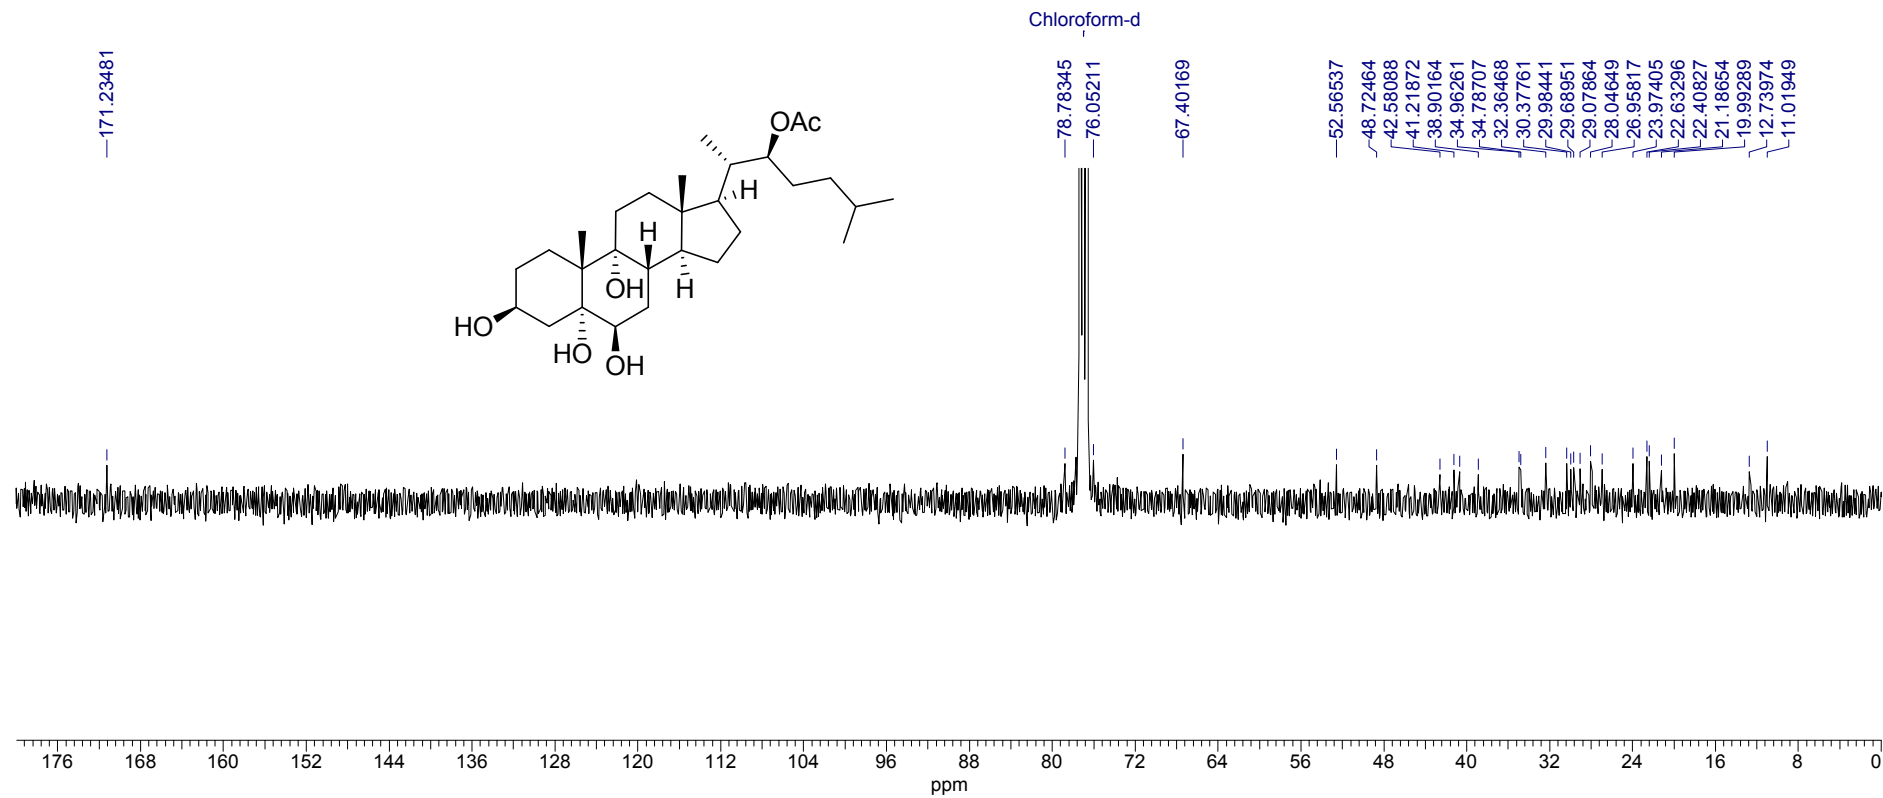

<sup>1</sup>H NMR of **17** in CDCl<sub>3</sub>

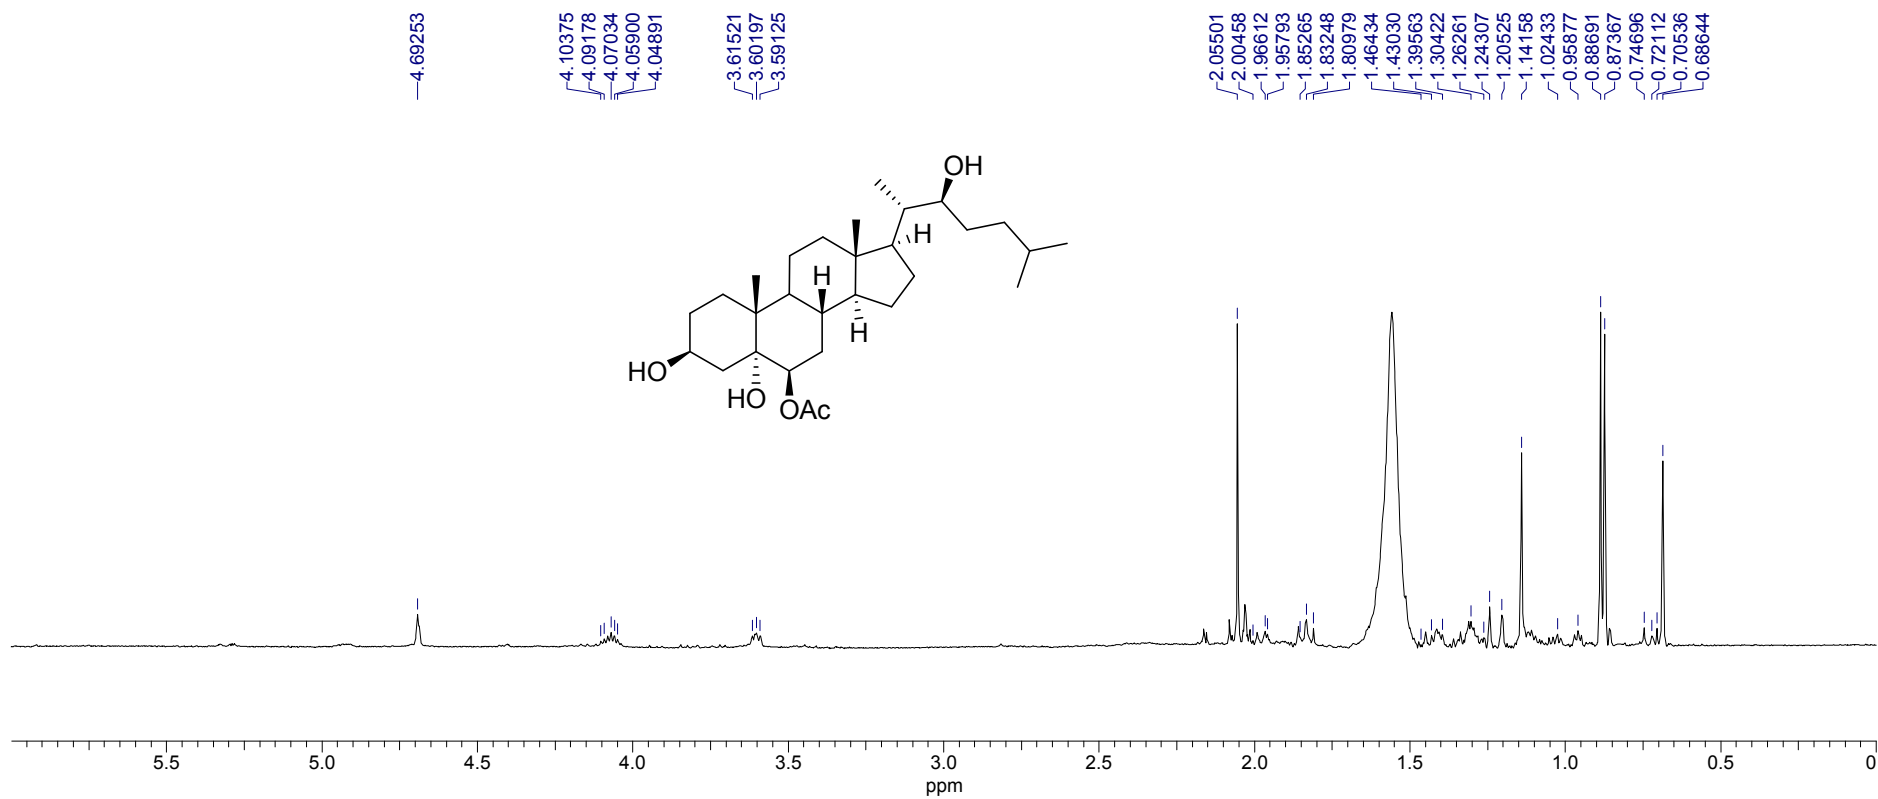

$^{13}\text{C}$  NMR spectrum of **17** in  $\text{CDCl}_3$

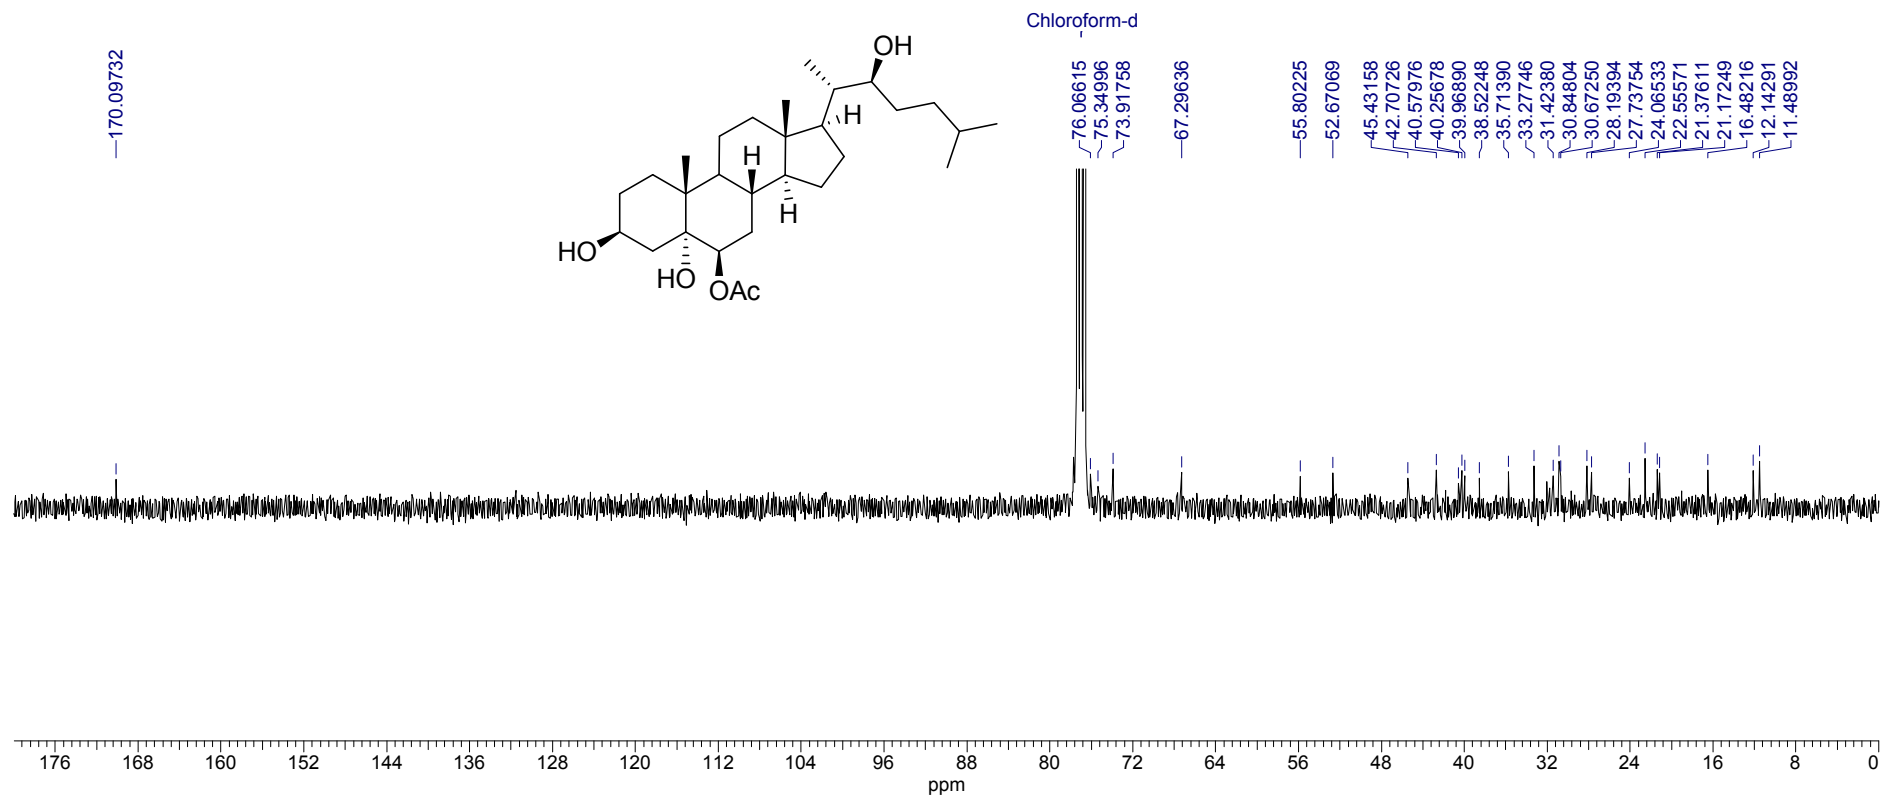

<sup>1</sup>H NMR of **18** in CDCl<sub>3</sub>

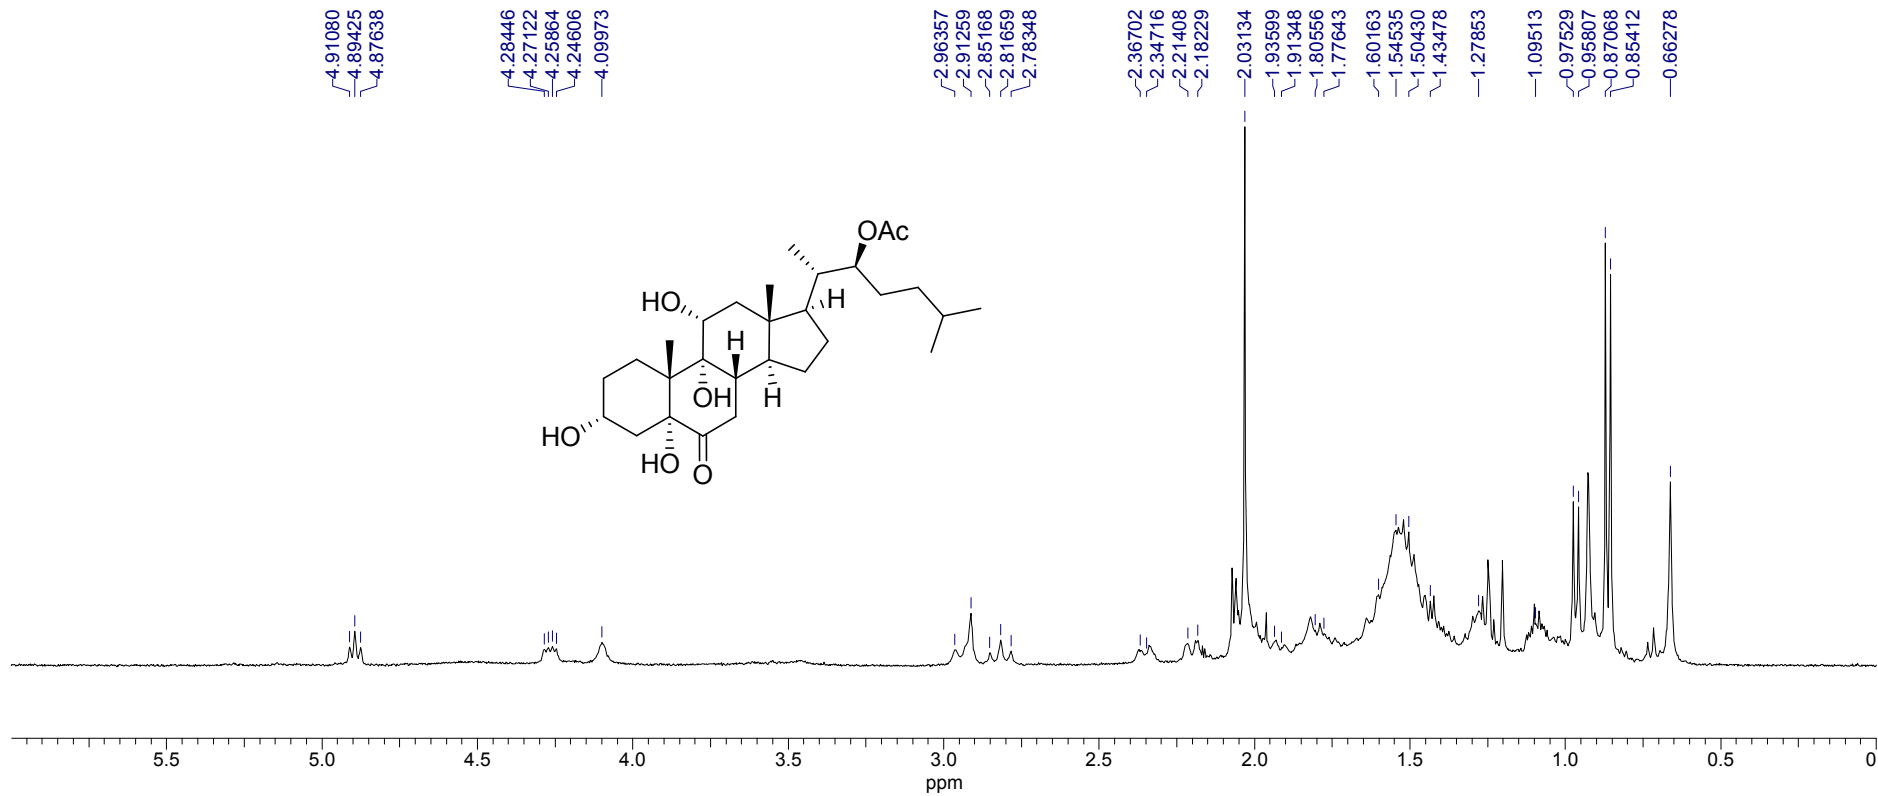

<sup>13</sup>C NMR spectrum of **18** in CDCl<sub>3</sub>

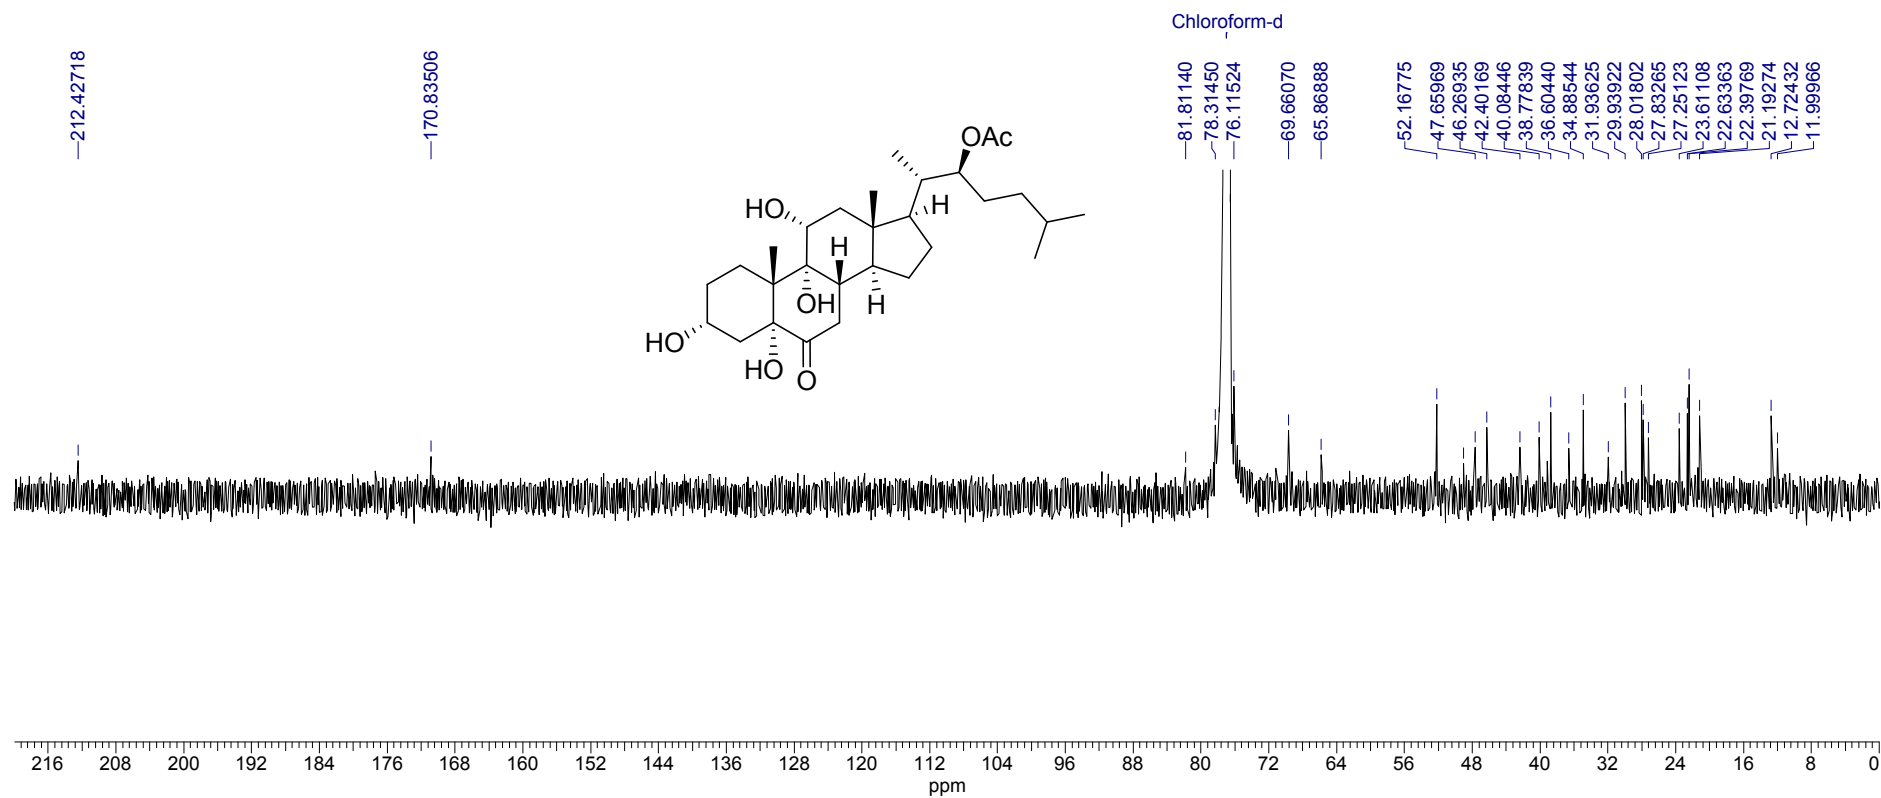

Supplement: c6ra04521a1.pdf [file c6ra04521a1.pdf]
